# Supplementary material for: White-light-emitting diode (LED)-promoted one-pot synthesis of 1,2-dihydropyrimido[1,2-a]benzimidazoles in the presence of a new spiky magnetic nanocatalyst and their anthelmintic studies
Source: Royal Society of Chemistry journal article supplement (doi:10.1039/d4cy00723a), 2024-01-01
Supplement: d4cy00723a1.pdf [file d4cy00723a1.pdf]

**A white light-emitting diode (LED) promoted one pot synthesis of 1,2-dihydropyrimido[1,2-*a*]benzimidazoles in presence of a new spiky magnetic nano catalyst and its anthelmintic studies.**

George Kupar Kharmawlong<sup>a,b,c</sup>, Bhusan Chettri<sup>d</sup>, Ridashisha Rymbai<sup>e</sup>, Ridaphun Nongrum<sup>b</sup>,  
Arun Kumar Yadav<sup>d</sup>, Surya Bhan<sup>e</sup> and Rishanlang Nongkhlaw<sup>a\*</sup>

*<sup>a</sup>Department of Chemistry, Centre for Advances studies in Chemistry, North-Eastern Hill University, India, Meghalaya, Shillong-793022.*

*<sup>b</sup>Department of Chemistry, Sankardev College, India, Meghalaya, Shillong-793004*

*<sup>c</sup> Department of Science, North East Adventist University, Khliehtyrshi, Meghalaya-793151.*

*<sup>d</sup>Department of Zoology, North-Eastern Hill University, India, Meghalaya, Shillong-793022.*

*<sup>d</sup>Department of Biochemistry, North-Eastern Hill University, India, Meghalaya, Shillong-793022.*

Gmail: [rlnongkhlaw@nehu.ac.in](mailto:rlnongkhlaw@nehu.ac.in)

| <b>Table of Content</b>                                                                                                        | <b>Page No</b> |
|--------------------------------------------------------------------------------------------------------------------------------|----------------|
| General procedure for the synthesis of 1,2-dihydropyrimido[1,2- <i>a</i> ]benzimidazoles and its derivatives                   | 2              |
| Analytical Data of the synthesized compounds <b>4 (a-e)</b> , <b>6 (a-n)</b> and <b>8 (a-e)</b>                                | 2-12           |
| <sup>1</sup> H and <sup>13</sup> C NMR Spectra of the synthesized compounds <b>4 (a-e)</b> , <b>6 (a-n)</b> and <b>8 (a-e)</b> | 13-36          |
| Tables of anthelmintic studies                                                                                                 | 3-40           |

## General procedure for the synthesis of 1,2-dihydropyrimido[1,2- *a*]benzimidazoles and its derivatives:

A mixture of aromatic aldehyde (1 mmol), 2-aminobenzimidazole/ 4*H*-1,2,4-triazol-3-amine (1 mmol), and active methylene compounds (malononitrile/ ethylacetoacetate/ methylacetoacetate) (1 mmol) was taken in a round bottom flask (100 mL) containing 25 mL of water and 14 mg of spiky Ni-nanoparticles was added under stirring condition at room temperature (25 °C). The reaction mixture was kept under direct irradiation of white LED light for appropriate time. After completion of the reaction (monitored by TLC), the catalyst was recovered by an external magnet and the products was filtered and recrystallized from ethanol to obtain the pure product.

### Analytical data:

#### 2-amino-4-phenyl-1,4-dihydrobenzo[4,5]imidazo[1,2-*a*]pyrimidine-3-carbonitrile (4a)

White solid, melting point: 234-236 °C [Lit<sup>1</sup>. 235-236 °C]; IR (KBr):  $\nu_{\max}$  3442, 3320, 3061, 2882, 2190, 1682, 1632, 1602, 1471, 1352, 1248, 1029  $\text{cm}^{-1}$ ; <sup>1</sup>H NMR (400 MHz, DMSO-*d*<sub>6</sub>):  $\delta$  8.60 (s, 1H), 7.63 (d, *J* = 8 Hz, 1H), 7.37-7.33 (m, 3H), 7.29-7.27 (m, 2H), 7.22 (d, *J* = 7.6 Hz, 1H), 7.11 (t, *J* = 7.6 Hz, 1H), 6.99 (t, *J* = 8 Hz, *J* = 7.2 Hz, 1H), 6.84 (s, 2H), 5.21 (s, 1H) ppm. <sup>13</sup>C NMR (100 MHz, DMSO-*d*<sub>6</sub>):  $\delta$  151.74, 149.09, 143.55, 142.88, 129.23, 128.66, 127.79, 125.87, 123.28, 119.82, 119.15, 116.01, 112.38, 61.91, 53.17 ppm. Calc. MS (ESI) *m/z*: 287. Found MS (ESI) *m/z*: 287 [M]<sup>+</sup>.

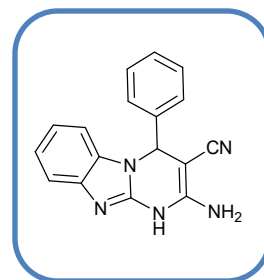

#### 2-amino-4-(2-chlorophenyl)-1,4-dihydrobenzo[4,5]imidazo[1,2-*a*]pyrimidine-3-carbonitrile (4b)

White solid, melting point: 236-238 °C [Lit<sup>1</sup>. 235-237 °C]; IR (KBr):  $\nu_{\max}$  3420, 3314, 3122, 2180, 1670, 1633, 1601, 1470, 1364, 1250, 1039  $\text{cm}^{-1}$ ; <sup>1</sup>H NMR (400 MHz, DMSO-*d*<sub>6</sub>):  $\delta$  8.52 (s, 1H), 7.66 (d, *J* = 8 Hz, 1H), 7.49-7.43 (m, 1H), 7.36-7.34 (m, 3H), 7.24 (d, *J* = 8 Hz, 1H), 7.13 (t, *J* = 8 Hz, *J* = 7.2 Hz, 1H), 7.02 (t, *J* = 8 Hz, *J* = 7.2 Hz, 1H), 6.90 (s, 2H), 5.64

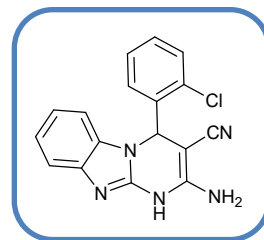

(s, 1H) ppm.  $^{13}\text{C}$  NMR (100 MHz,  $\text{DMSO}-d_6$ ):  $\delta$  151.69, 149.49, 143.49, 139.25, 131.34, 129.71, 129.22, 128.38, 127.87, 123.35, 119.93, 118.49, 116.05, 112.43, 60.74, 50.77 ppm. Calc. MS (ESI)  $m/z$ : 321. Found MS (ESI)  $m/z$ : 322  $[\text{M}+1]^+$ .

**2-amino-4-(4-bromophenyl)-1,4-dihydrobenzo[4,5]imidazo[1,2-*a*]pyrimidine-3-carbonitrile (4c)**

White solid, melting point:  $>310$  °C [Lit<sup>1</sup>. 318-320 °C]; IR (KBr):  $\nu_{\text{max}}$  3422, 3326, 3064, 2188, 1675, 1636, 1598, 1467, 1338, 1245, 1072  $\text{cm}^{-1}$ ;  $^1\text{H}$  NMR (400 MHz,  $\text{DMSO}-d_6$ ):  $\delta$  8.62 (s, 1H), 7.62 (d,  $J = 7.2$  Hz, 1H), 7.56 (d,  $J = 8$  Hz, 2H), 7.24 (d,  $J = 7.6$  Hz, 3H), 7.11 (t,  $J = 7.6$  Hz,  $J = 6.4$  Hz, 1H), 7.00 (t,  $J = 7.6$  Hz,  $J = 6.4$  Hz, 1H), 6.89 (s, 2H), 5.24 (s, 1H) ppm.  $^{13}\text{C}$  NMR (100 MHz,  $\text{DMSO}-d_6$ ):  $\delta$  151.55, 149.19, 143.48, 142.16, 131.57, 129.19, 128.22, 123.33, 120.93, 119.89, 119.01, 116.07, 112.43, 61.33, 52.55 ppm. Calc. MS (ESI)  $m/z$ : 365. Found MS (ESI)  $m/z$ : 366  $[\text{M}+1]^+$ , 368  $[\text{M}+2]^+$ .

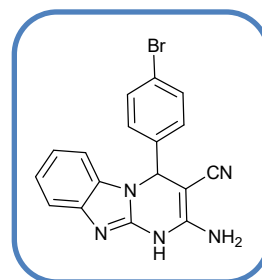

**2-amino-4-(4-nitrophenyl)-1,4-dihydrobenzo[4,5]imidazo[1,2-*a*]pyrimidine-3-carbonitrile (4d)**

White solid, melting point: 236-238 °C [Lit<sup>2</sup>. 237 °C]; IR (KBr):  $\nu_{\text{max}}$  3463, 3325, 3227, 3014, 2196, 1686, 1637, 1601, 1516, 1474, 1351, 1256, 1013  $\text{cm}^{-1}$ ;  $^1\text{H}$  NMR (400 MHz,  $\text{DMSO}-d_6$ ):  $\delta$  8.79 (s, 1H), 8.24 (d,  $J = 8.4$  Hz, 2H), 7.64 (d,  $J = 8$  Hz, 1H), 7.56 (d,  $J = 8.4$  Hz, 2H), 7.25 (d,  $J = 7.6$  Hz, 1H), 7.13 (t,  $J = 7.2$  Hz,  $J = 7.6$  Hz, 1H), 7.03-7.01 (m, 1H), 6.98 (s, 2H), 5.45 (s, 1H) ppm.  $^{13}\text{C}$  NMR (100 MHz,  $\text{DMSO}-d_6$ ):  $\delta$  151.41, 150.10, 149.41, 146.97, 143.45, 129.17, 127.18, 124.04, 123.43, 120.02, 118.92, 116.17, 112.50, 60.55, 52.44 ppm. Calc. MS (ESI)  $m/z$ : 332. Found MS (ESI)  $m/z$ : 333  $[\text{M}+1]^+$ .

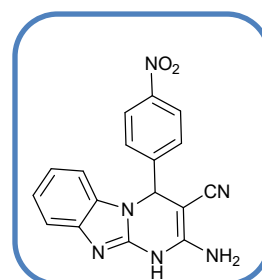

**2-amino-4-(4-chlorophenyl)-1,4-dihydrobenzo[4,5]imidazo[1,2-*a*]pyrimidine-3-carbonitrile (4e)**

White solid, melting point: 236-238 °C [Lit<sup>1</sup>. 235-238 °C]; IR (KBr):  $\nu_{\max}$  3421, 3326, 3068, 2186, 1679, 1638, 1585, 1467, 1309, 1246, 1094  $\text{cm}^{-1}$ ; <sup>1</sup>H NMR (400 MHz, DMSO-*d*<sub>6</sub>):  $\delta$  8.54 (s, 1H), 7.61 (d, *J* = 8 Hz, 1H), 7.41 (d, *J* = 8.4 Hz, 2H), 7.29 (d, *J* = 8.8 Hz, 2H), 7.21 (d, *J* = 8 Hz, 1H), 7.09 (t, *J* = 7.6 Hz, *J* = 8 Hz, 1H), 6.98 (t, *J* = 8 Hz, *J* = 7.2 Hz, 1H), 6.88 (s, 2H), 5.24 (s, 1H) ppm. <sup>13</sup>C NMR (100 MHz, DMSO-*d*<sub>6</sub>):  $\delta$  151.55, 149.19, 143.49, 141.75, 138.98, 130.01, 129.19, 128.63, 127.87, 123.31, 119.86, 119.01, 116.06, 114.00, 112.40, 61.38, 52.50 ppm. Calc. MS (ESI) *m/z*: 321. Found MS (ESI) *m/z*: 322 [M+1]<sup>+</sup>.

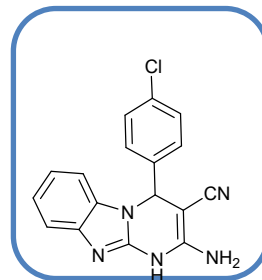

**methyl 2-methyl-4-phenyl-1,4-dihydrobenzo[4,5]imidazo[1,2-*a*]pyrimidine-3-carboxylate (6a)**

White solid, melting point: 262-264 °C ; IR (KBr):  $\nu_{\max}$  3379, 3206, 3064, 2952, 2856, 1633, 1604, 1580, 1459, 1353, 1250, 1097  $\text{cm}^{-1}$ ; <sup>1</sup>H NMR (400 MHz, DMSO-*d*<sub>6</sub>):  $\delta$  10.86 (s, 1H), 7.33 (d, *J* = 8.4 Hz, 3H), 7.24 (t, *J* = 6.8 Hz, *J* = 7.6 Hz, 3H), 7.15 (t, *J* = 7.2 Hz, 1H), 7.02 (t, *J* = 7.6 Hz, 1H), 6.93 (t, *J* = 7.6 Hz, *J* = 7.2 Hz, 1H), 6.42 (s, 1H), 3.55 (s, 3H), 2.44 (s, 3H) ppm. <sup>13</sup>C NMR (100 MHz, DMSO-*d*<sub>6</sub>):  $\delta$  165.62, 146.63, 145.58, 142.23, 141.93, 131.43, 128.39, 127.71, 126.85, 121.70, 120.14, 116.73, 109.76, 97.79, 59.29, 55.74, 50.74, 18.62, 13.98 ppm. Calc. MS (ESI) *m/z*: 319. Found MS (ESI) *m/z*: 320 [M+1]<sup>+</sup>.

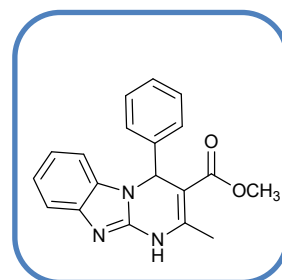

**methyl 4-(4-bromophenyl)-2-methyl-1,4-dihydrobenzo[4,5]imidazo[1,2-*a*]pyrimidine-3-carboxylate (6b)**

White solid, melting point: 262-264 °C [Lit<sup>3</sup>. 263-264 °C]; IR (KBr):  $\nu_{\max}$  3310, 3228, 3096, 2957, 2842, 1669, 1654, 1619, 1574, 1438, 1339, 1267, 1075  $\text{cm}^{-1}$ ; <sup>1</sup>H NMR (400 MHz, DMSO-*d*<sub>6</sub>):  $\delta$  10.90 (s, 1H), 7.44 (d, *J* = 8 Hz, 2H), 7.34-7.28 (m, 3H), 7.24 (d, *J* = 8 Hz, 1H), 7.03 (t, *J* = 8 Hz, *J* = 7.2 Hz, 1H), 6.94 (t, *J* = 7.2 Hz, *J* = 7.6 Hz, 1H), 6.43 (s, 1H), 3.55 (s,

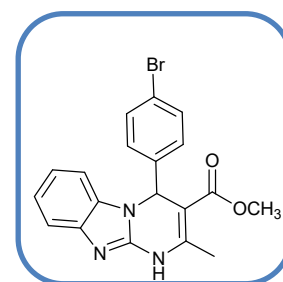

3H), 2.43 (s, 3H) ppm.  $^{13}\text{C}$  NMR (100 MHz,  $\text{DMSO-}d_6$ ):  $\delta$  164.88, 146.32, 144.75, 141.57, 140.68, 130.73, 128.51, 121.22, 120.26, 119.65, 116.20, 109.14, 96.66, 54.53, 50.18, 18.06 ppm. Calc. MS (ESI)  $m/z$ : 397. Found MS (ESI)  $m/z$ : 397  $[\text{M}]^+$ , 399  $[\text{M}+2]^+$ .

**methyl** **4-(4-fluorophenyl)-2-methyl-1,4-dihydrobenzo[4,5]imidazo[1,2-*a*]pyrimidine-3-carboxylate (6c)**

White solid, melting point: 172-174 °C ; IR (KBr):  $\nu_{\text{max}}$  3381, 3234, 3039, 2948, 2863, 1700, 1655, 1617, 1571, 1458, 1384, 1236, 1095  $\text{cm}^{-1}$ ;  $^1\text{H}$  NMR (400 MHz,  $\text{DMSO-}d_6$ ):  $\delta$  10.88 (s, 1H), 7.39-7.36 (m, 2H), 7.33 (d,  $J = 7.6$  Hz, 1H), 7.26 (d,  $J = 8$  Hz, 1H), 7.09-7.00 (m, 3H), 6.94 (t,  $J = 7.6$  Hz, 1H), 6.45 (s, 1H), 3.55 (s, 3H), 2.43 (s, 3H) ppm.  $^{13}\text{C}$  NMR (100 MHz,  $\text{DMSO-}d_6$ ):  $\delta$  165.58, 162.57, 160.14, 146.75, 145.41, 142.14, 138.23, 131.31, 128.90, 121.82, 120.25, 116.77, 115.09, 109.76, 97.65, 59.35, 54.99, 18.62, 13.97 ppm. Calc. MS (ESI)  $m/z$ : 337. Found MS (ESI)  $m/z$ : 338  $[\text{M}+1]^+$ .

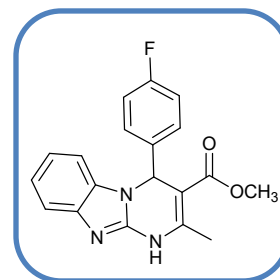

**methyl** **4-(3-hydroxyphenyl)-2-methyl-1,4-dihydrobenzo[4,5]imidazo[1,2-*a*]pyrimidine-3-carboxylate (6d)**

White solid, melting point: 260-262 °C ; IR (KBr):  $\nu_{\text{max}}$  3331, 3154, 3039, 2948, 2841, 1666, 1646, 1619, 1571, 1457, 1343, 1263, 1093  $\text{cm}^{-1}$ ;  $^1\text{H}$  NMR (400 MHz,  $\text{DMSO-}d_6$ ):  $\delta$  10.79 (s, 1H), 9.36 (s, 1H), 7.33 (d,  $J = 8$  Hz, 1H), 7.22 (d,  $J = 8$  Hz, 1H), 7.02 (t,  $J = 8$  Hz,  $J = 7.6$  Hz, 2H), 6.94 (t,  $J = 7.6$  Hz,  $J = 7.2$  Hz, 1H), 6.77 (d,  $J = 7.6$  Hz, 1H), 6.64 (s, 1H), 6.54 (d,  $J = 8$  Hz, 1H), 6.33 (s, 1H), 3.57 (s, 3H), 2.42 (s, 3H) ppm.  $^{13}\text{C}$  NMR (100 MHz,  $\text{DMSO-}d_6$ ):  $\delta$  166.15, 157.83, 146.87, 146.14, 143.70, 142.71, 131.97, 129.73, 122.18, 120.61, 118.16, 117.19, 115.27, 113.87, 110.28, 98.33, 56.07, 51.25, 19.10 ppm. Calc. MS (ESI)  $m/z$ : 335. Found MS (ESI)  $m/z$ : 336  $[\text{M}+1]^+$ .

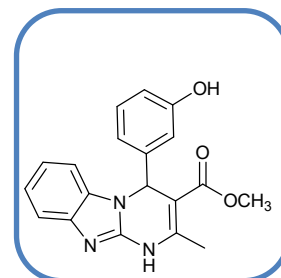

**methyl** **4-(4-methoxyphenyl)-2-methyl-1,4-dihydrobenzo[4,5]imidazo[1,2-*a*]pyrimidine-3-carboxylate (6e)**

White solid, melting point: 240-242 °C ; IR (KBr):  $\nu_{\max}$  3307, 3031, 2951, 2834, 1698, 1654, 1611, 1570, 1456, 1383, 1257, 1089  $\text{cm}^{-1}$ ;  $^1\text{H}$  NMR (400 MHz,  $\text{DMSO-}d_6$ ):  $\delta$  10.79 (s, 1H), 7.32 (d,  $J = 7.6$  Hz, 1H), 7.24 (d,  $J = 8.8$  Hz, 3H), 7.02 (t,  $J = 7.6$  Hz,  $J = 8$  Hz, 1H), 6.93 (t,  $J = 6.8$  Hz,  $J = 7.2$  Hz, 1H), 6.78 (d,  $J = 8.8$  Hz, 2H), 6.37 (s, 1H), 3.64 (s, 3H), 3.34 (s, 3H), 2.43 (s, 3H) ppm.  $^{13}\text{C}$  NMR (100 MHz,  $\text{DMSO-}d_6$ ):  $\delta$  165.67, 158.57, 146.27, 145.59, 142.25, 134.05, 131.44, 128.07, 121.63, 120.06, 116.67, 113.67, 109.82, 98.03, 55.15, 54.88, 50.74, 18.59 ppm. Calc. MS (ESI)  $m/z$ : 349. Found MS (ESI)  $m/z$ : 350  $[\text{M}+1]^+$ .

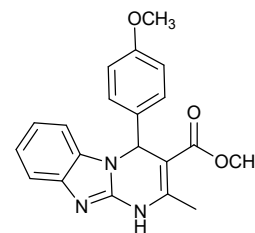

**methyl 4-(3-methoxyphenyl)-2-methyl-1,4-dihydrobenzo[4,5]imidazo[1,2-a]pyrimidine-3-carboxylate (6f)**

White solid, melting point: 212-214 °C ; IR (KBr):  $\nu_{\max}$  3233, 3023, 2924, 2833, 1694, 1657, 1619, 1572, 1488, 1379, 1256, 1086  $\text{cm}^{-1}$ ;  $^1\text{H}$  NMR (400 MHz,  $\text{DMSO-}d_6$ ):  $\delta$  10.82 (s, 1H), 7.34-7.27 (m, 2H), 7.15 (t,  $J = 8$  Hz, 1H), 7.03 (t,  $J = 8$  Hz,  $J = 7.2$  Hz, 1H), 6.94 (t,  $J = 8$  Hz,  $J = 7.2$  Hz, 1H), 6.89 (s, 1H), 6.83 (d,  $J = 8$  Hz, 1H), 6.74 (d,  $J = 8$  Hz, 1H), 6.39 (s, 1H), 3.66 (s, 3H), 3.57 (s, 3H), 2.43 (s, 3H) ppm.  $^{13}\text{C}$  NMR (100 MHz,  $\text{DMSO-}d_6$ ):  $\delta$  166.13, 159.51, 147.18, 146.12, 143.95, 142.72, 131.96, 130.11, 122.24, 120.69, 119.29, 117.24, 113.75, 112.89, 110.37, 98.20, 56.04, 55.41, 51.27, 19.11 ppm. Calc. MS (ESI)  $m/z$ : 349. Found MS (ESI)  $m/z$ : 350  $[\text{M}+1]^+$ .

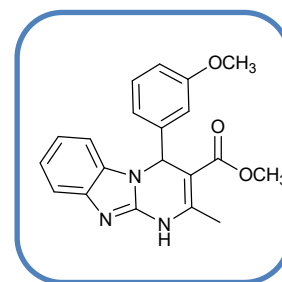

**ethyl 2-methyl-4-(4-nitrophenyl)-1,4-dihydrobenzo[4,5]imidazo[1,2-a]pyrimidine-3-carboxylate (6g)**

White solid, melting point: 300-302 °C [Lit<sup>4</sup>. 302-303 °C]; IR (KBr):  $\nu_{\max}$  3310, 3235, 3039, 2928, 2856, 1697, 1656, 1618, 1571, 1458, 1351, 1254, 1093  $\text{cm}^{-1}$ ;  $^1\text{H}$  NMR (400 MHz,  $\text{DMSO-}d_6$ ):  $\delta$  10.96 (s, 1H), 8.12 (d,  $J = 8.8$  Hz, 2H), 7.64 (d,  $J = 8.8$  Hz, 2H), 7.35 (d,  $J = 8$  Hz, 1H), 7.26 (d,  $J = 7.6$  Hz, 1H), 7.04 (t,  $J = 8$  Hz,  $J = 7.2$  Hz, 1H), 6.94 (t,  $J = 6.8$  Hz,  $J = 7.6$  Hz, 1H), 6.59 (s, 1H), 4.03-3.97 (m, 2H), 2.46 (s, 3H), 1.14 (t,  $J = 6.8$  Hz,

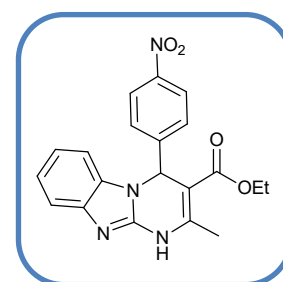

$J = 7.2$  Hz, 3H) ppm.  $^{13}\text{C}$  NMR (100 MHz,  $\text{DMSO-}d_6$ ):  $\delta$  165.36, 149.46, 147.94, 147.36, 145.68, 142.68, 131.78, 128.97, 124.15, 122.48, 120.88, 117.42, 110.22, 97.23, 59.99, 55.67, 19.20, 14.49 ppm. Calc. MS (ESI)  $m/z$ : 378. Found MS (ESI)  $m/z$ : 379  $[\text{M}+1]^+$ .

**ethyl 4-(4-fluorophenyl)-2-methyl-1,4-dihydrobenzo[4,5]imidazo[1,2-*a*]pyrimidine-3-carboxylate (6h)**

White solid, melting point:  $>310$  °C [Lit<sup>3</sup>.  $>300$  °C]; IR (KBr):  $\nu_{\text{max}}$  3370, 3236, 3039, 2982, 2868, 1696, 1657, 1615, 1515, 1458, 1329, 1253, 1096  $\text{cm}^{-1}$ ;  $^1\text{H}$  NMR (400 MHz,  $\text{DMSO-}d_6$ ):  $\delta$  10.83 (s, 1H), 7.41-7.37 (m, 2H), 7.33 (d,  $J = 8$  Hz, 1H), 7.26 (d,  $J = 8$  Hz, 1H), 7.09-7.00 (m, 3H), 6.94 (t,  $J = 7.6$  Hz, 1H), 6.44 (s, 1H), 4.02-3.97 (m, 2H), 2.44 (s, 3H), 1.12 (t,  $J = 7.2$  Hz,  $J = 6.8$  Hz, 3H) ppm.  $^{13}\text{C}$  NMR (100 MHz,  $\text{DMSO-}d_6$ ):  $\delta$  165.05, 162.56, 160.14, 146.60, 145.38, 142.19, 138.27, 131.37, 129.17, 121.77, 120.17, 116.76, 115.21, 114.99, 109.81, 97.68, 59.33, 55.09, 18.57, 13.99 ppm. Calc. MS (ESI)  $m/z$ : 351. Found MS (ESI)  $m/z$ : 352  $[\text{M}+1]^+$ .

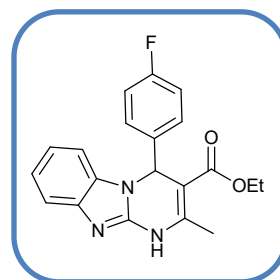

**ethyl 4-(2-chlorophenyl)-2-methyl-1,4-dihydrobenzo[4,5]imidazo[1,2-*a*]pyrimidine-3-carboxylate (6i)**

White solid, melting point:  $>310$  °C [Lit<sup>3</sup>.  $>300$  °C]; IR (KBr):  $\nu_{\text{max}}$  3383, 3241, 3107, 2927, 2851, 1700, 1663, 1619, 1594, 1577, 1459, 1385, 1256, 1086  $\text{cm}^{-1}$ ;  $^1\text{H}$  NMR (400 MHz,  $\text{DMSO-}d_6$ ):  $\delta$  10.93 (s, 1H), 7.43 (d,  $J = 7.2$  Hz, 1H), 7.38-7.32 (m, 2H), 7.28-7.16 (m, 3H), 7.03 (t,  $J = 7.6$  Hz, 1H), 6.93 (t,  $J = 7.6$  Hz, 1H), 6.73 (s, 1H), 3.97 (q,  $J = 4$  Hz, 2H), 2.45 (s, 3H), 1.06 (t,  $J = 6.8$  Hz,  $J = 7.2$  Hz, 3H) ppm.  $^{13}\text{C}$  NMR (100 MHz,  $\text{DMSO-}d_6$ ):  $\delta$  164.92, 147.25, 145.17, 142.05, 138.75, 131.63, 131.58, 130.41, 129.58, 129.44, 127.34, 121.86, 120.27, 116.86, 109.14, 96.28, 59.22, 53.64, 18.59, 13.97 ppm. Calc. MS (ESI)  $m/z$ : 367. Found MS (ESI)  $m/z$ : 368  $[\text{M}+1]^+$ .

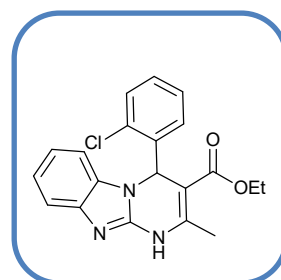

**ethyl 4-(3-chlorophenyl)-2-methyl-1,4-dihydrobenzo[4,5]imidazo[1,2-*a*]pyrimidine-3-carboxylate (6j)**

White solid, melting point: 268-270 °C [Lit<sup>4</sup>. 269.6-269.8 °C]; IR (KBr):  $\nu_{\max}$  3310, 3236, 3048, 2928, 2865, 1698, 1657, 1615, 1571, 1457, 1365, 1258, 1088  $\text{cm}^{-1}$ ; <sup>1</sup>H NMR (400 MHz, DMSO-*d*<sub>6</sub>):  $\delta$  10.87 (s, 1H), 7.45 (s, 1H), 7.34 (d, *J* = 8 Hz, 1H), 7.29-7.23 (m, 4H), 7.04 (t, *J* = 7.6 Hz, 1H), 6.96 (t, *J* = 7.6 Hz, *J* = 7.2 Hz, 1H), 6.45 (s, 1H), 4.01 (q, *J* = 8.8 Hz, *J* = 7.2 Hz, 2H), 2.44 (s, 3H), 1.14 (t, *J* = 7.2 Hz, 3H) ppm. <sup>13</sup>C NMR (100 MHz, DMSO-*d*<sub>6</sub>):  $\delta$  164.95, 146.99, 145.34, 144.35, 142.18, 132.79, 131.36, 130.36, 127.71, 127.07, 125.61, 121.88, 120.29, 116.83, 109.81, 97.25, 59.38, 55.28, 18.64, 13.94 ppm. Calc. MS (ESI) *m/z*: 367. Found MS (ESI) *m/z*: 368 [M+1]<sup>+</sup>.

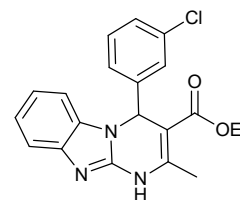

**ethyl 4-(3-hydroxyphenyl)-2-methyl-1,4-dihydrobenzo[4,5]imidazo[1,2-a]pyrimidine-3-carboxylate (6k)**

White solid, melting point: 242-244 °C ; IR (KBr):  $\nu_{\max}$  3351, 3241, 3031, 2909, 2842, 1678, 1615, 1591, 1571, 1455, 1369, 1257, 1091  $\text{cm}^{-1}$ ; <sup>1</sup>H NMR (400 MHz, DMSO-*d*<sub>6</sub>):  $\delta$  10.80 (s, 1H), 9.38 (s, 1H), 7.33 (d, *J* = 8 Hz, 1H), 7.22-7.20 (m, 1H), 7.03 (t, *J* = 8 Hz, 2H), 6.94 (t, *J* = 8 Hz, *J* = 7.2 Hz, 1H), 6.78 (t, *J* = 6.8 Hz, *J* = 6 Hz, 1H), 6.65 (d, *J* = 5.6 Hz, 1H), 6.55 (d, *J* = 8 Hz, 1H), 6.32 (s, 1H), 4.04-3.98 (m, 2H), 2.42 (s, 3H), 1.14 (t, *J* = 7.2 Hz, *J* = 6.8 Hz, 3H) ppm. <sup>13</sup>C NMR (100 MHz, DMSO-*d*<sub>6</sub>):  $\delta$  165.67, 165.18, 157.28, 145.60, 143.25, 142.22, 131.51, 129.14, 121.68, 120.08, 117.88, 166.68, 114.74, 113.58, 109.79, 97.92, 59.32, 55.72, 18.56, 14.01 ppm. Calc. MS (ESI) *m/z*: 349. Found MS (ESI) *m/z*: 350 [M+1]<sup>+</sup>.

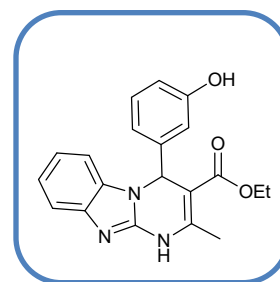

**ethyl 4-(3-methoxyphenyl)-2-methyl-1,4-dihydrobenzo[4,5]imidazo[1,2-a]pyrimidine-3-carboxylate (6l)**

White solid, melting point: 210-212 °C [Lit<sup>4</sup>. 211-214 °C]; IR (KBr):  $\nu_{\max}$  3389, 3232, 3100, 3021, 2924, 2839, 1702, 1657, 1618, 1575, 1457, 1365, 1249, 1086, 1048  $\text{cm}^{-1}$ ; <sup>1</sup>H NMR (400 MHz, DMSO-*d*<sub>6</sub>):  $\delta$  10.81 (s, 1H),

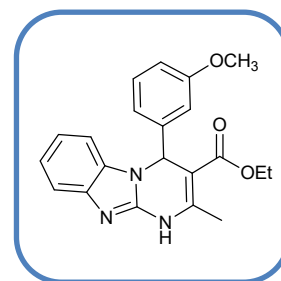



7.34-7.27 (m, 2H), 7.15 (t,  $J = 8$  Hz, 1H), 7.02 (t,  $J = 8$  Hz,  $J = 7.2$  Hz, 1H), 6.96-6.92 (m, 2H), 6.85-6.82 (m, 1H), 6.74 (dd,  $J = 8$  Hz,  $J = 2.8$  Hz, 1H), 6.38 (s, 1H), 4.05-3.96 (m, 2H), 3.67 (s, 3H), 2.43 (s, 3H), 1.14 (t,  $J = 7.2$  Hz,  $J = 6.8$  Hz, 3H) ppm.  $^{13}\text{C}$  NMR (100 MHz,  $\text{DMSO-}d_6$ ):  $\delta$  165.62, 159.44, 146.98, 146.06, 144.00, 143.94, 142.73, 131.99, 130.01, 122.20, 120.62, 119.46, 117.19, 113.95, 112.87, 110.37, 98.25, 59.82, 56.16, 55.40, 19.05, 14.52 ppm. Calc. MS (ESI)  $m/z$ : 363. Found MS (ESI)  $m/z$ : 364  $[\text{M}+1]^+$ .

**ethyl 4-(4-methoxyphenyl)-2-methyl-1,4-dihydrobenzo[4,5]imidazo[1,2-*a*]pyrimidine-3-carboxylate (6m)**

White solid, melting point: 250-252 °C [Lit<sup>4</sup>. 250-252 °C]; IR (KBr):  $\nu_{\text{max}}$  3394, 3231, 3017, 2907, 2838, 1705, 1656, 1617, 1574, 1457, 1365, 1247, 1080  $\text{cm}^{-1}$ ;  $^1\text{H}$  NMR (400 MHz,  $\text{DMSO-}d_6$ ):  $\delta$  10.76 (s, 1H), 7.32 (d,  $J = 8$  Hz, 2H), 7.26-7.23 (m, 2H), 7.02 (t,  $J = 7.2$  Hz,  $J = 7.6$  Hz, 1H), 6.93 (t,  $J = 7.6$  Hz,  $J = 8$  Hz, 1H), 6.74 (d,  $J = 8.4$  Hz, 2H), 6.36 (s, 1H), 4.03-3.90 (m, 2H), 3.64 (s, 3H), 2.43 (s, 3H), 1.13 (t,  $J = 7.2$  Hz,  $J = 6.8$  Hz, 3H) ppm.  $^{13}\text{C}$  NMR (100 MHz,  $\text{DMSO-}d_6$ ):  $\delta$  165.66, 165.17, 158.57, 146.26, 146.07, 145.58, 142.25, 134.10, 131.44, 128.23, 121.62, 120.01, 116.66, 113.66, 109.82, 98.10, 59.25, 54.88, 50.73, 18.59, 14.03 ppm. Calc. MS (ESI)  $m/z$ : 363. Found MS (ESI)  $m/z$ : 364  $[\text{M}+1]^+$ .

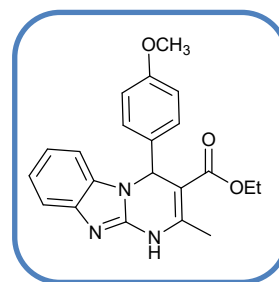

**ethyl 4-(4-ethoxyphenyl)-2-methyl-1,4-dihydrobenzo[4,5]imidazo[1,2-*a*]pyrimidine-3-carboxylate (6n)**

White solid, melting point: 252-254 °C [Lit<sup>5</sup>. 253-255 °C]; IR (KBr):  $\nu_{\text{max}}$  3303, 3192, 2975, 2888, 1650, 1614, 1558, 1474, 1391, 1248, 1051  $\text{cm}^{-1}$ ;  $^1\text{H}$  NMR (400 MHz,  $\text{DMSO-}d_6$ ):  $\delta$  10.77 (s, 1H), 7.33 (d,  $J = 8$  Hz, 1H), 7.25 (d,  $J = 8$  Hz, 1H), 7.25 (d,  $J = 8.4$  Hz, 3H), 7.03 (t,  $J = 7.6$  Hz, 1H),

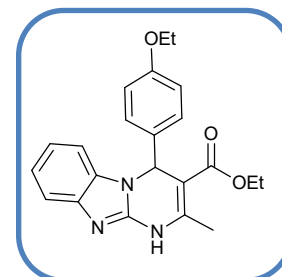

6.94 (t,  $J = 7.2$  Hz, 1H), 6.78 (d,  $J = 8.4$  Hz, 2H), 6.37 (s, 1H), 4.04-3.96 (m, 2H), 3.91 (q,  $J = 7.2$  Hz,  $J = 7.6$  Hz, 2H), 2.44 (s, 3H), 1.24 (t,  $J = 7.2$  Hz,  $J = 6.8$  Hz, 3H), 1.14 (t,  $J = 6.8$  Hz,  $J = 7.2$  Hz, 3H) ppm.  $^{13}\text{C}$  NMR (100 MHz, DMSO- $d_6$ ):  $\delta$  165.18, 157.87, 146.06, 145.53, 142.19, 133.93, 131.44, 128.24, 121.64, 120.03, 116.65, 113.95, 109.83, 98.10, 62.81, 59.28, 55.26, 18.52, 14.51, 14.00 ppm. Calc. MS (ESI)  $m/z$ : 377. Found MS (ESI)  $m/z$ : 378  $[\text{M}+1]^+$ .

**methyl 5-methyl-7-phenyl-4,7-dihydro-[1,2,4]triazolo[1,5-*a*]pyrimidine-6-carboxylate (8a)**

White solid, melting point: 220-222 °C ; IR (KBr):  $\nu_{\text{max}}$  3244, 3137, 3063, 1734, 1699, 1594, 1484, 1339, 1180, 1076  $\text{cm}^{-1}$ ;  $^1\text{H}$  NMR (400 MHz, DMSO- $d_6$ ):  $\delta$  10.85 (s, 1H), 7.65 (s, 1H), 7.45-7.41 (m, 2H), 7.29 (d,  $J = 7.2$  Hz, 2H), 7.20 (d,  $J = 7.6$  Hz, 2H), 6.26 (s, 1H), 3.50 (s, 3H), 2.41 (s, 3H) ppm.  $^{13}\text{C}$  NMR (100 MHz, DMSO- $d_6$ ):  $\delta$  165.58, 150.09, 146.86, 141.90, 128.39, 127.88, 126.78, 97.01, 81.17, 59.28, 50.85, 18.47 ppm. Calc. MS (ESI)  $m/z$ : 270. Found MS (ESI)  $m/z$ : 271  $[\text{M}+1]^+$ .

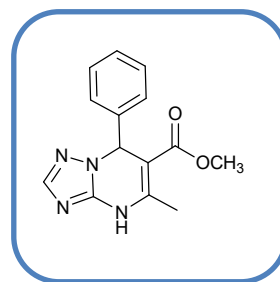

**methyl 7-(4-hydroxyphenyl)-5-methyl-4,7-dihydro-[1,2,4]triazolo[1,5-*a*]pyrimidine-6-carboxylate (8b)**

White solid, melting point: 282-284 °C ; IR (KBr):  $\nu_{\text{max}}$  3232, 3099, 3023, 1697, 1674, 1617, 1578, 1456, 1328, 1247, 1092  $\text{cm}^{-1}$ ;  $^1\text{H}$  NMR (400 MHz, DMSO- $d_6$ ):  $\delta$  10.74 (s, 1H), 9.47 (s, 1H), 7.64 (s, 1H), 7.01 (d,  $J = 8.4$  Hz, 2H), 6.67 (d,  $J = 8.4$  Hz, 2H), 6.17 (s, 1H), 3.52 (s, 3H), 2.40 (s, 3H) ppm.  $^{13}\text{C}$  NMR (100 MHz, DMSO- $d_6$ ):  $\delta$  165.69, 156.98, 149.89, 146.80, 146.35, 132.48, 127.99, 114.99, 97.35, 58.75, 50.82, 18.41 ppm. Calc. MS (ESI)  $m/z$ : 286. Found MS (ESI)  $m/z$ : 287  $[\text{M}+1]^+$ .

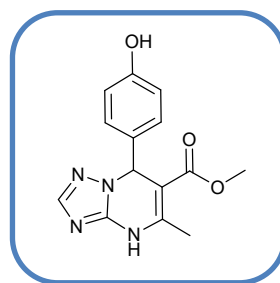

**methyl 7-(4-ethoxyphenyl)-5-methyl-4,7-dihydro-[1,2,4]triazolo[1,5-*a*]pyrimidine-6-carboxylate (8c)**

White solid, melting point: 210-212 °C ; IR (KBr):  $\nu_{\max}$  3313, 3133, 3063, 1671, 1658, 1611, 1510, 1486, 1385, 1297, 1151, 1035  $\text{cm}^{-1}$ ;  $^1\text{H}$  NMR (400 MHz,  $\text{DMSO-}d_6$ ):  $\delta$  10.77 (s,1H), 7.63 (s, 1H), 7.1 (d,  $J = 8$  Hz, 2H), 6.8 (d,  $J = 8.4$  Hz, 2H), 6.20 (s, 1H), 3.96 (q,  $J = 7.2$  Hz,  $J = 6.8$  Hz, 2H), 3.50 (s, 3H), 2.39 (s,3H), 1.28 (t,  $J = 7.2$  Hz, 3H) ppm.  $^{13}\text{C}$  NMR (100 MHz,  $\text{DMSO-}d_6$ ):  $\delta$  165.64, 158.06, 149.95, 146.82, 146.54, 133.93, 127.99, 114.07, 97.21, 62.89, 58.69, 50.82, 18.42, 14.54 ppm. Calc. MS (ESI)  $m/z$ : 314. Found MS (ESI)  $m/z$ : 315  $[\text{M}+1]^+$ .

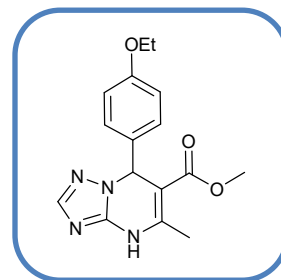

**ethyl 5-methyl-7-(4-nitrophenyl)-4,7-dihydro-[1,2,4]triazolo[1,5-a]pyrimidine-6-carboxylate (8d)**

White solid, melting point: 234-236 °C ; IR (KBr):  $\nu_{\max}$  3235, 3148, 3070, 1709, 1624, 1600, 1541, 1495, 1383, 1231, 1151, 1093  $\text{cm}^{-1}$ ;  $^1\text{H}$  NMR (400 MHz,  $\text{DMSO-}d_6$ ):  $\delta$  10.98 (s,1H), 8.17 (d,  $J = 8$  Hz, 2H), 7.67 (s, 1H), 7.51 (d,  $J = 8$  Hz, 2H), 6.41 (s, 1H), 3.93 (q,  $J = 2.8$  Hz, 2H), 2.42 (s, 3H), 1.02 (t,  $J = 6.8$  Hz,  $J = 7.2$  Hz, 3H) ppm.  $^{13}\text{C}$  NMR (100 MHz,  $\text{DMSO-}d_6$ ):  $\delta$  164.76, 150.43, 148.94, 147.64, 146.79, 128.48, 123.64, 96.07, 81.37, 59.50, 58.82, 18.52, 13.79 ppm. Calc. MS (ESI)  $m/z$ : 329. Found MS (ESI)  $m/z$ : 330  $[\text{M}+1]^+$ .

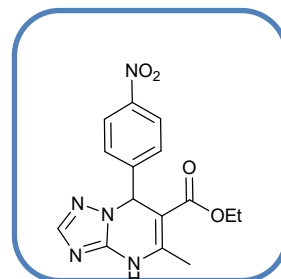

**ethyl 7-(4-hydroxyphenyl)-5-methyl-4,7-dihydro-[1,2,4]triazolo[1,5-a]pyrimidine-6-carboxylate (8e)**

White solid, melting point: 292-294 °C ; IR (KBr):  $\nu_{\max}$  3249, 3155, 3078, 1698, 1635, 1542, 1456, 1383, 1262, 1154, 1079  $\text{cm}^{-1}$ ;  $^1\text{H}$  NMR (400 MHz,  $\text{DMSO-}d_6$ ):  $\delta$  10.71 (s,1H), 9.46 (s,1H), 7.64 (s,1H), 7.02 (d,  $J = 8$  Hz, 2H), 6.67 (d,  $J = 8$  Hz, 2H), 6.17 (s, 1H), 4.01-3.92 (m, 2H), 2.40 (s, 3H), 1.06 (t,  $J = 6.8$  Hz, 3H,) ppm.  $^{13}\text{C}$  NMR (100 MHz,  $\text{DMSO-}d_6$ ):  $\delta$  165.16, 156.94, 149.87, 146.77, 146.13, 132.64, 128.12, 114.90, 97.53, 59.25, 58.87, 18.31, 13.87 ppm. Calc. MS (ESI)  $m/z$ : 300. Found MS (ESI)  $m/z$ : 301  $[\text{M}+1]^+$ .

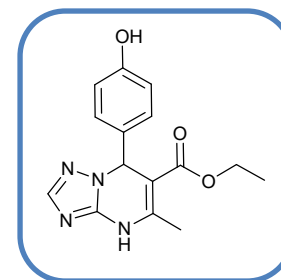

**References**

- (1) Hemmati, B.; Javanshir, S.; Dolatkhah, Z. *RSC Adv.* **2016**, *6* (56), 50431–50436.
- (2) Hamidinasab, M.; Mobinikhaledi, A. *ChemistrySelect* **2019**, *4* (1), 17–23.
- (3) Shaterian, H. R.; Fahimi, N.; Azizi, K. *Res. Chem. Intermed.* **2014**, *40* (5), 1879–1898.
- (4) Abedini, M.; Shirini, F.; Mousapour, M.; Goli Jolodar, O. *Res. Chem. Intermed.* **2016**, *42* (7), 6221–6229.
- (5) Reddy, M. V.; Reddy, A. V. S.; Jeong, Y. T. *Res. Chem. Intermed.* **2016**, *42* (5), 4893–4906.

## Spectral Data

### <sup>1</sup>H NMR of (4a)

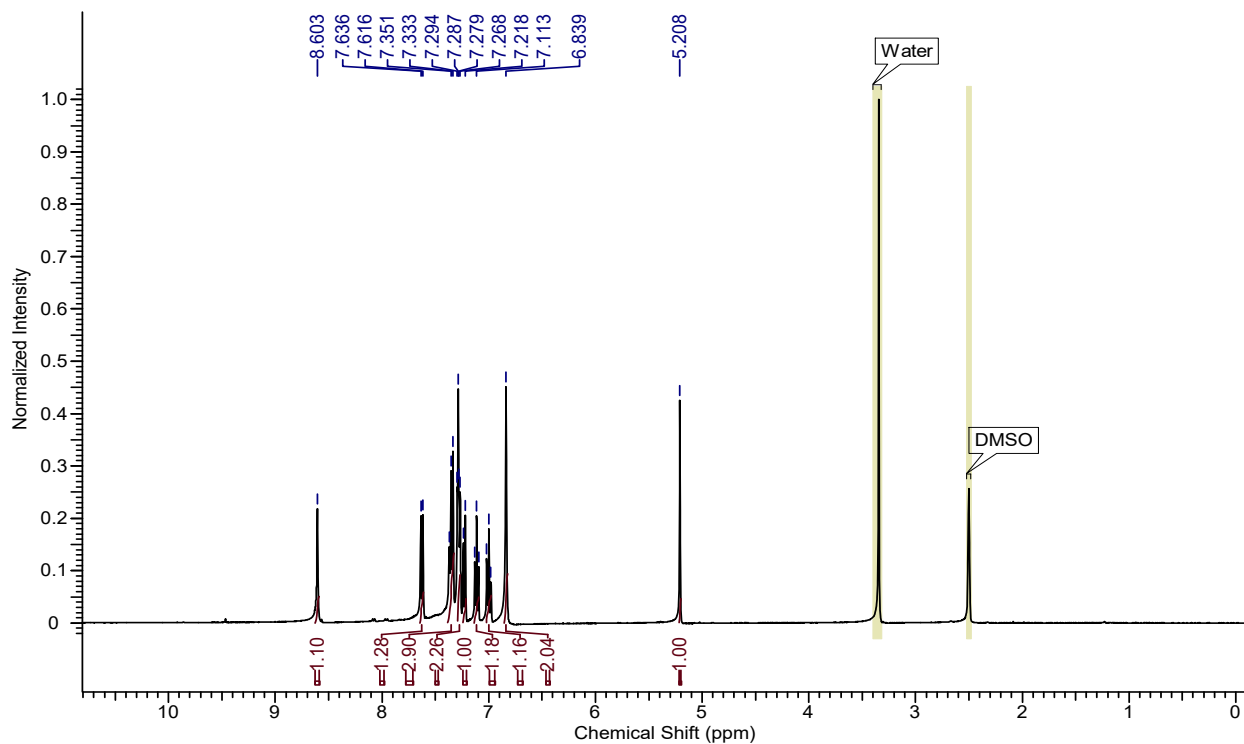

**<sup>13</sup>C NMR of (4a)**

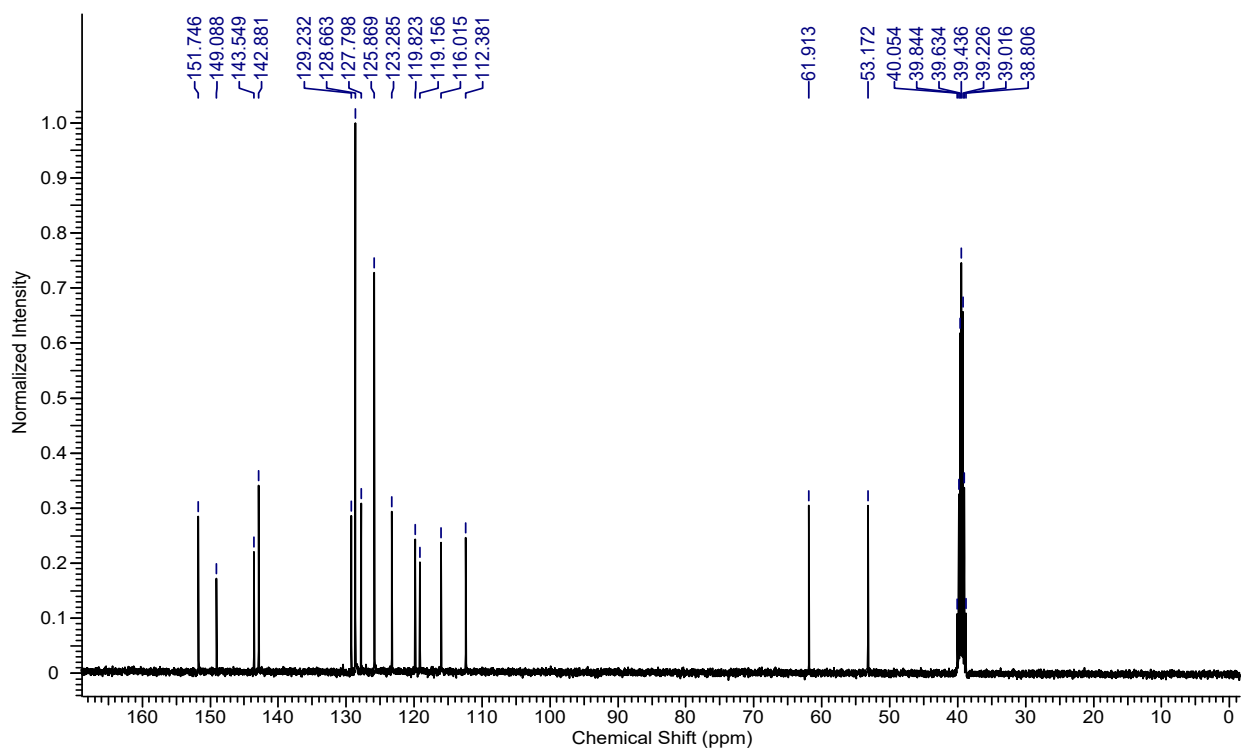

**<sup>1</sup>H NMR of (4b)**

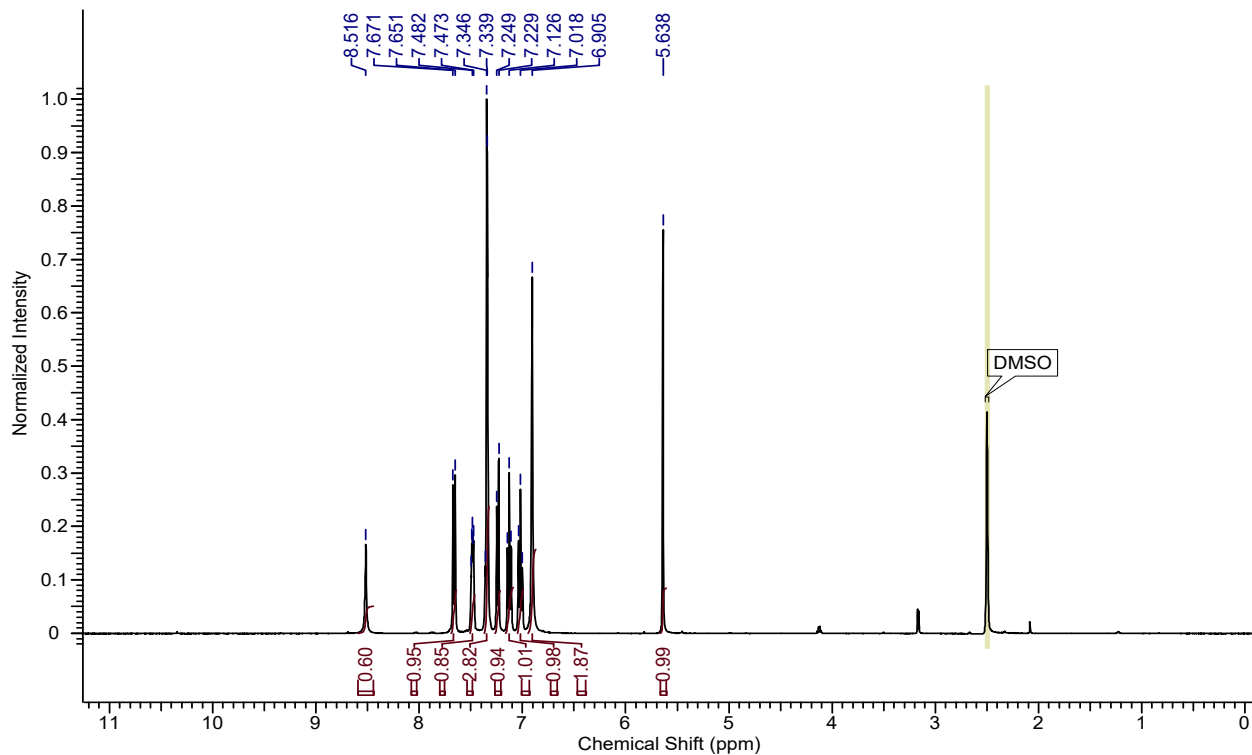

**<sup>13</sup>C NMR of (4b)**

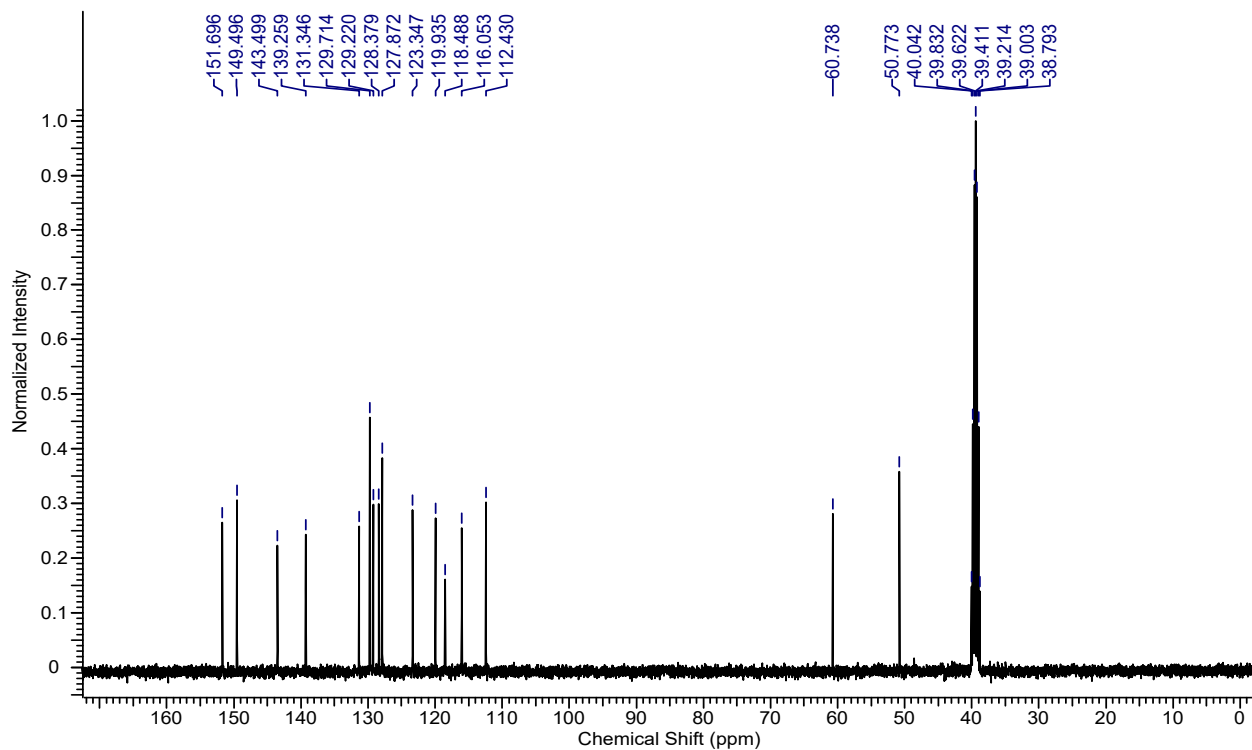

**<sup>1</sup>H NMR of (4c)**

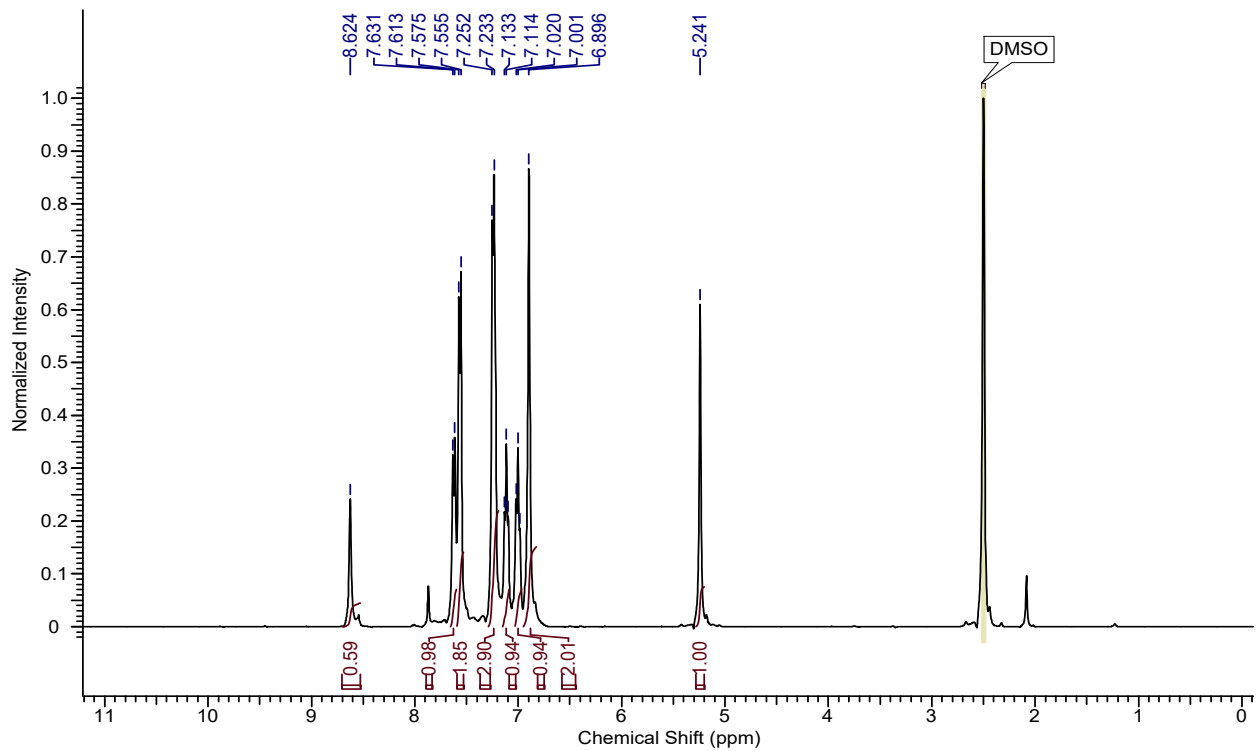

**<sup>13</sup>C NMR of (4c)**

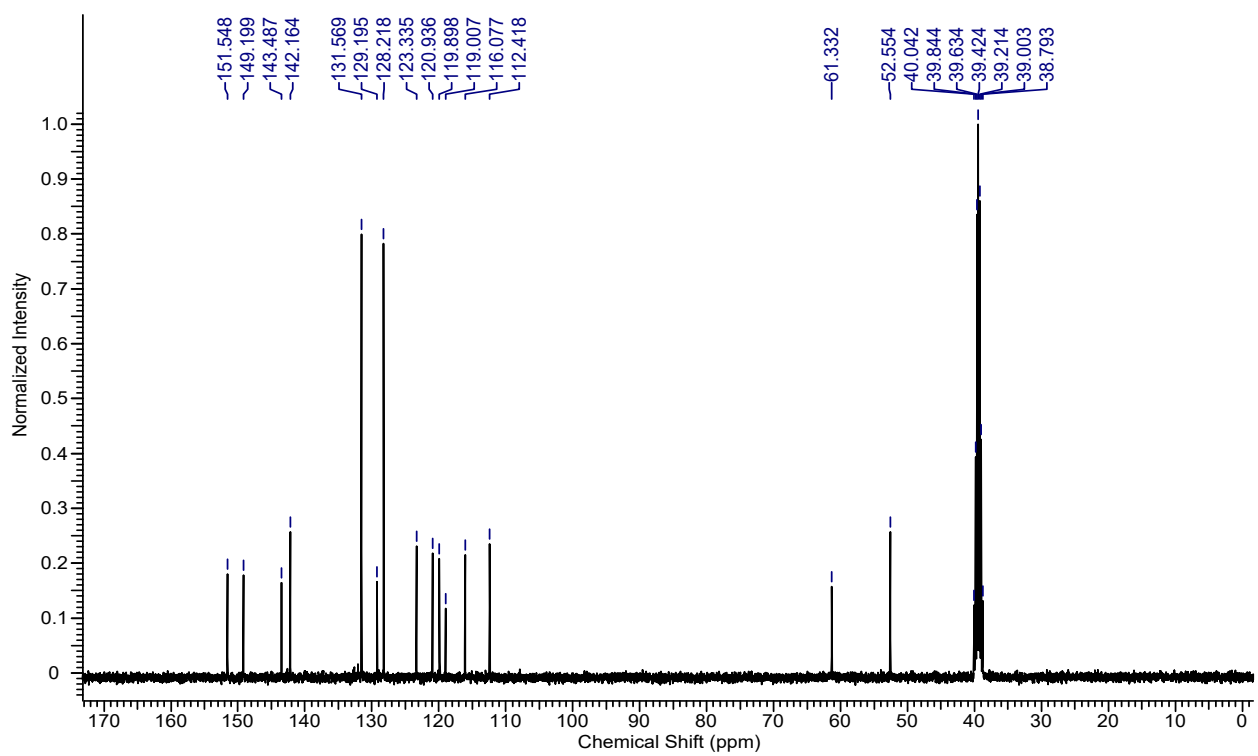

**<sup>1</sup>H NMR of (4d)**

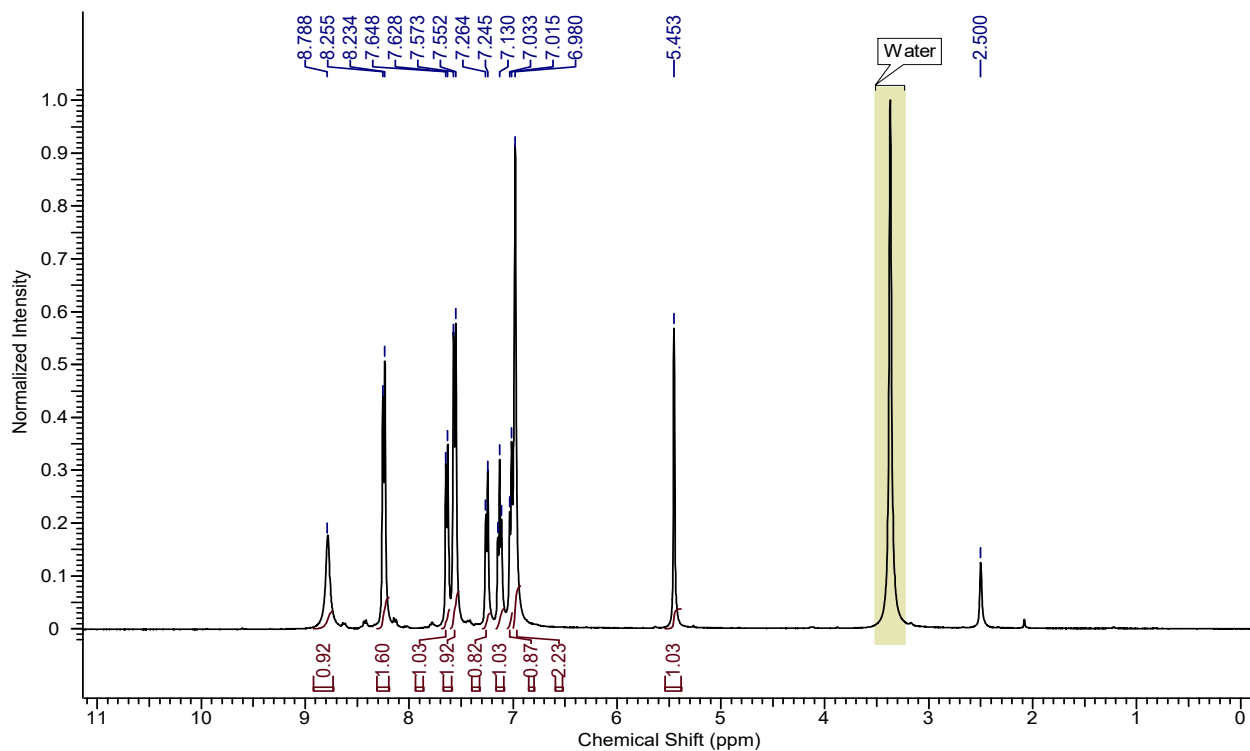

**<sup>13</sup>C NMR of (4d)**

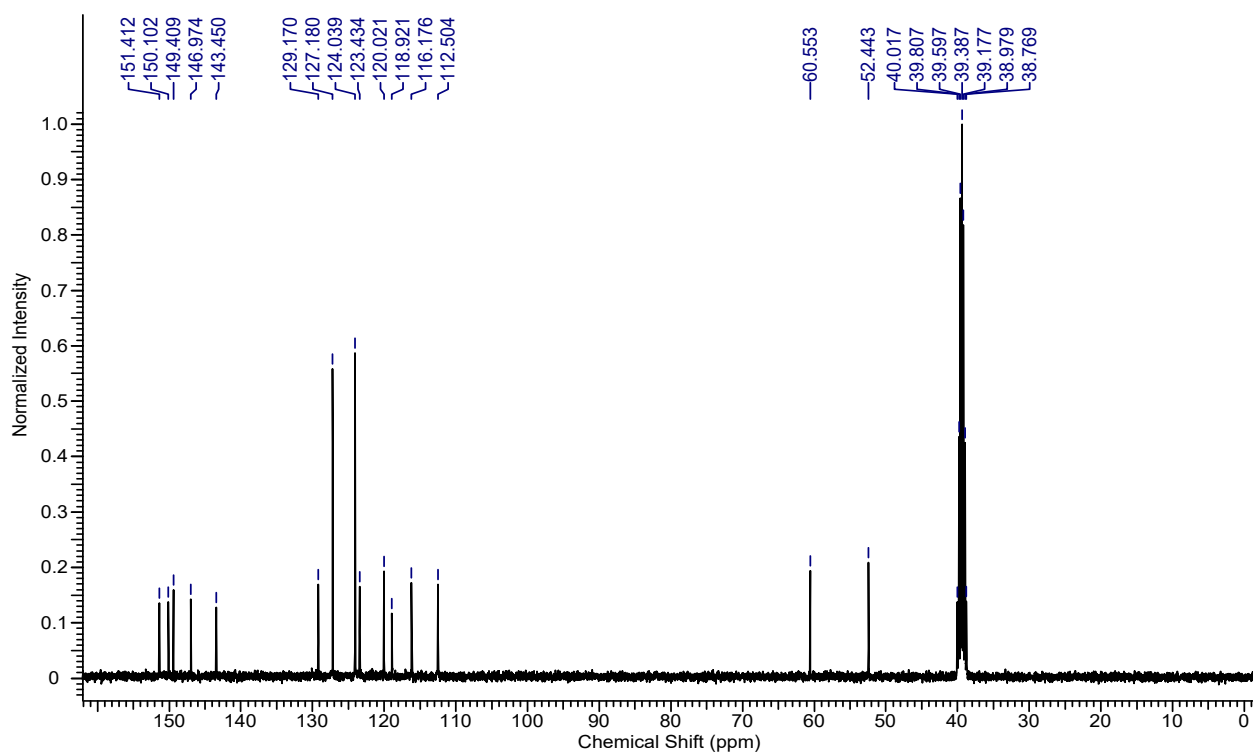

**<sup>1</sup>H NMR of (4e)**



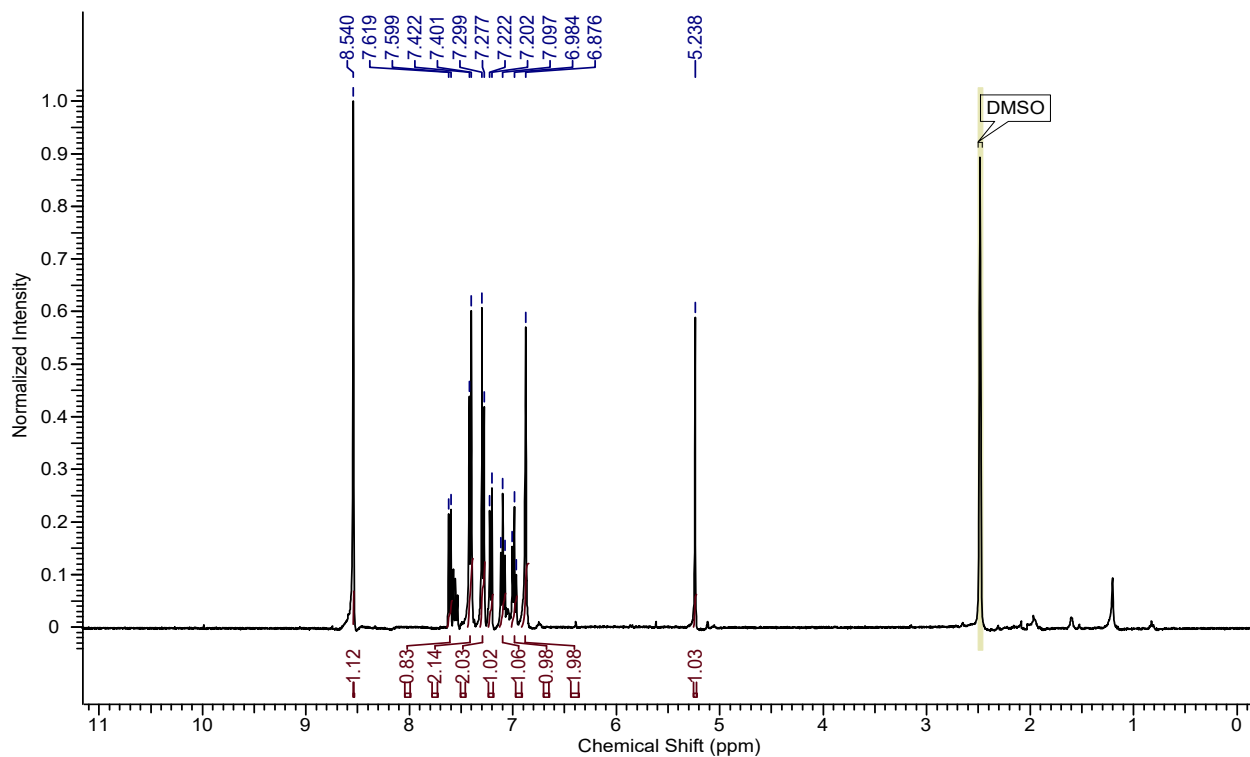

**<sup>13</sup>C NMR of (4e)**

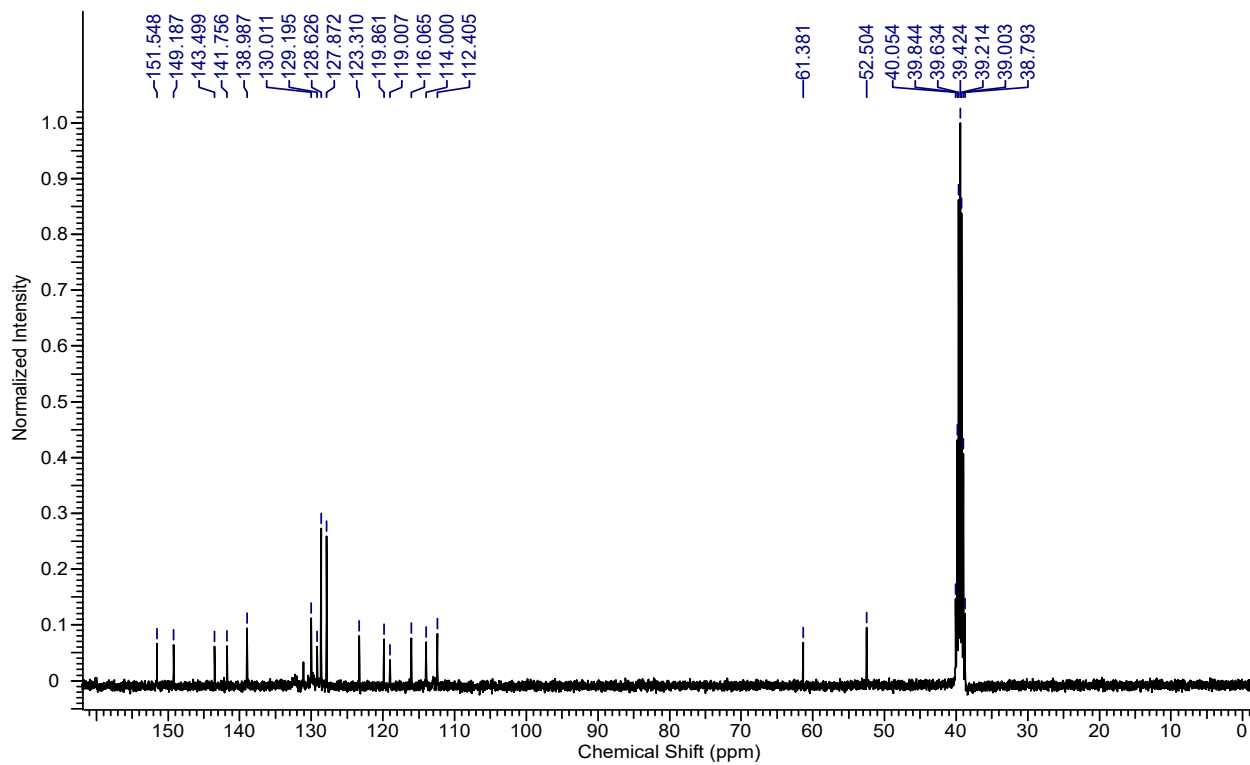

**<sup>1</sup>H NMR of (6a)**

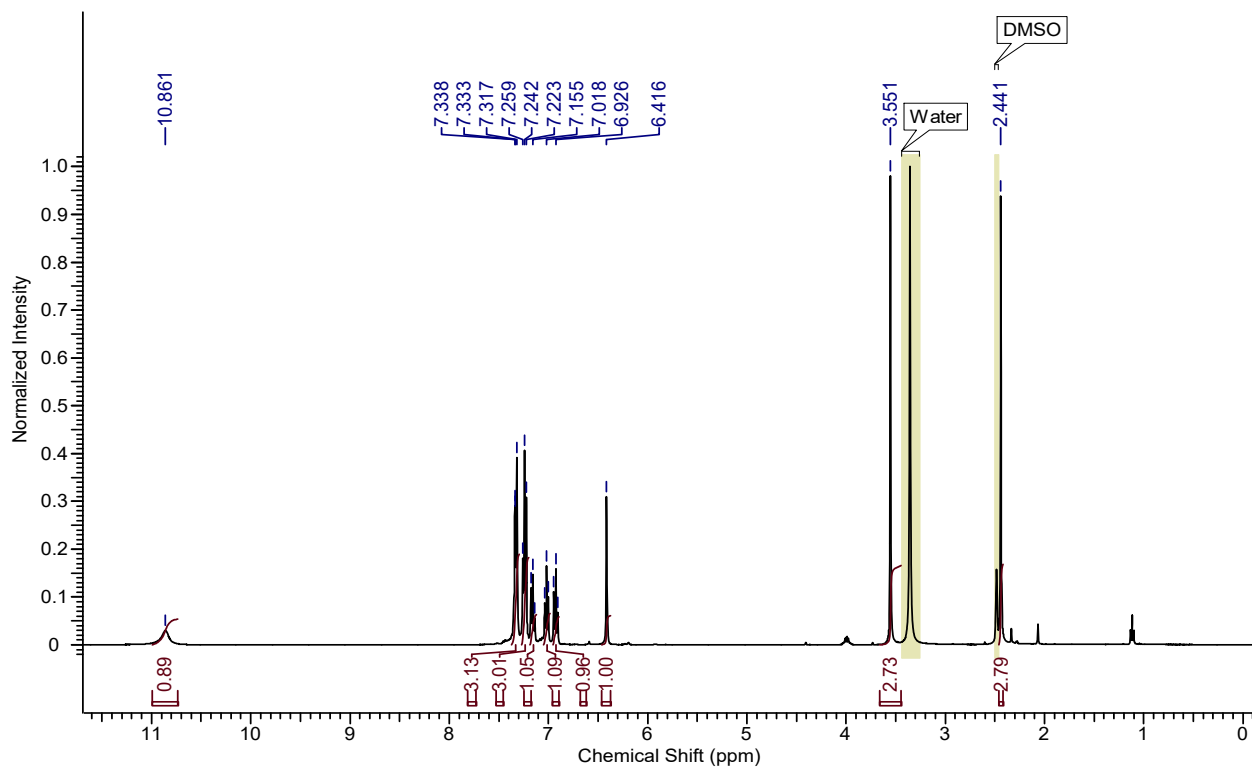

**<sup>13</sup>C NMR of (6a)**

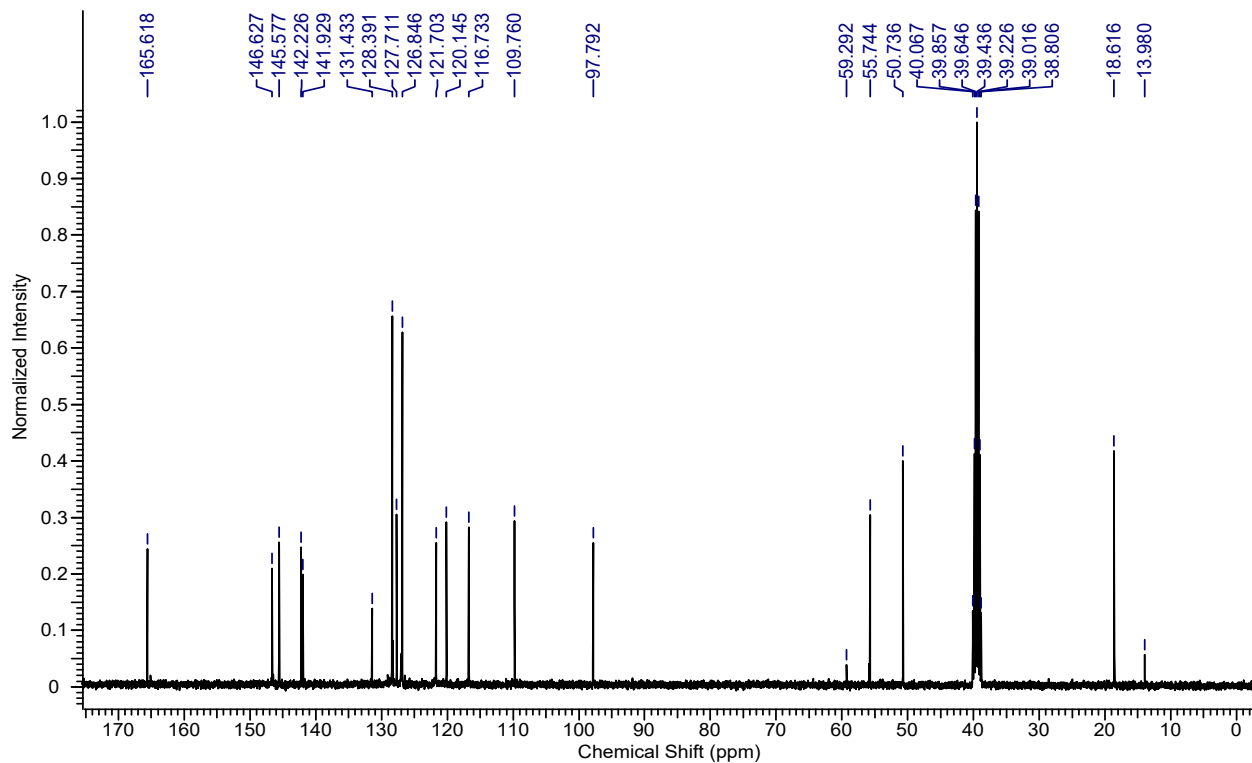

**<sup>1</sup>H NMR of (6b)**

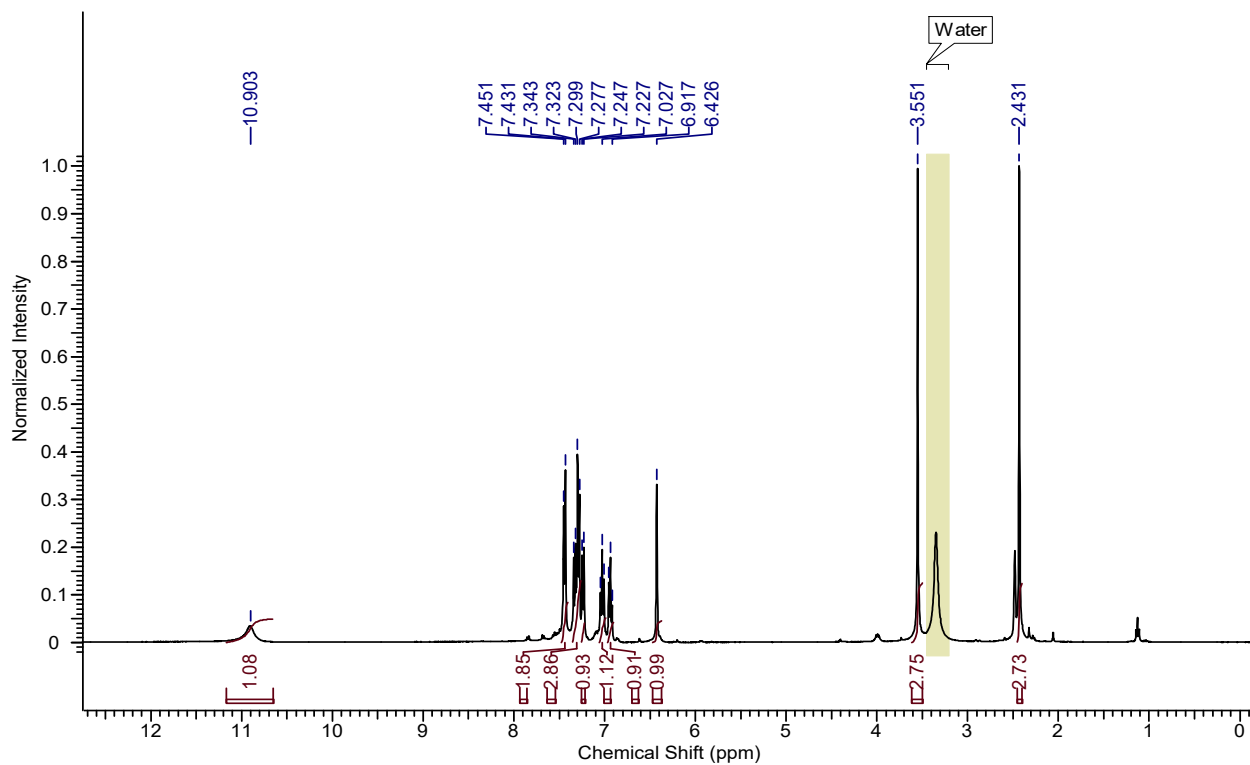

**<sup>13</sup>C NMR of (6b)**

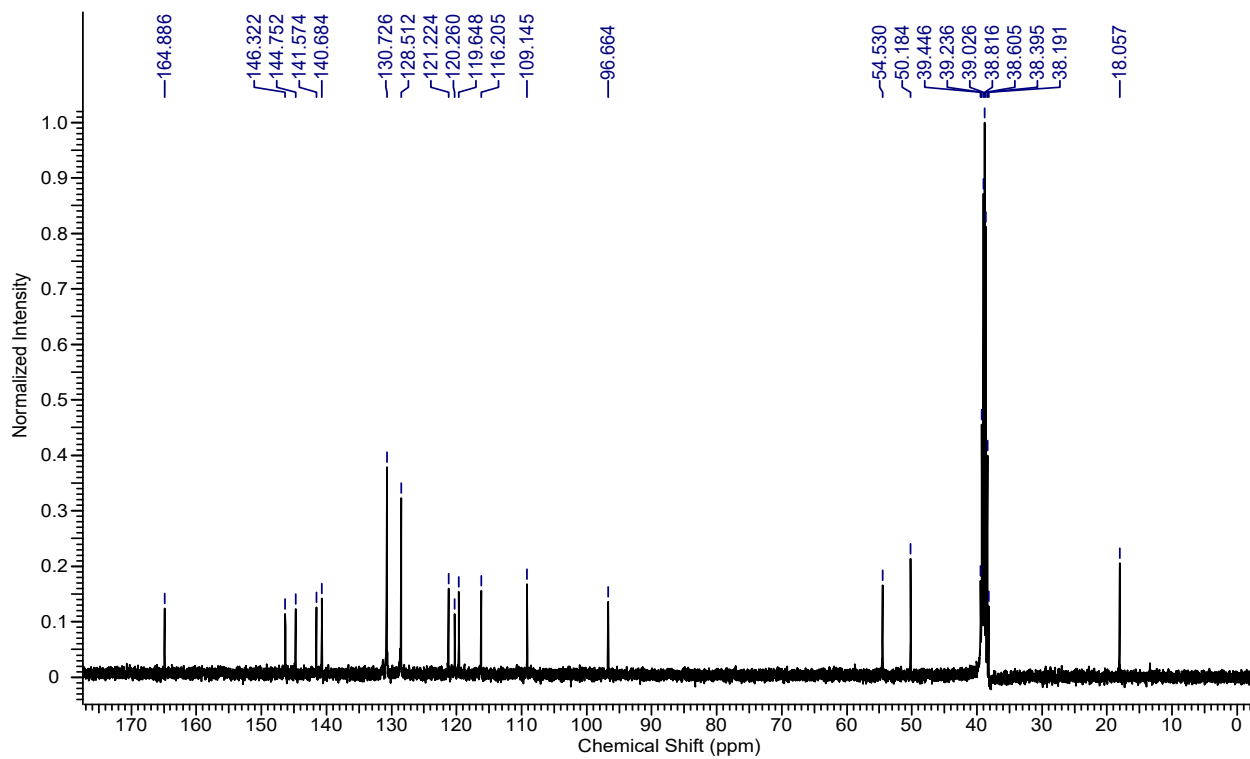

**<sup>1</sup>H NMR of (6c)**

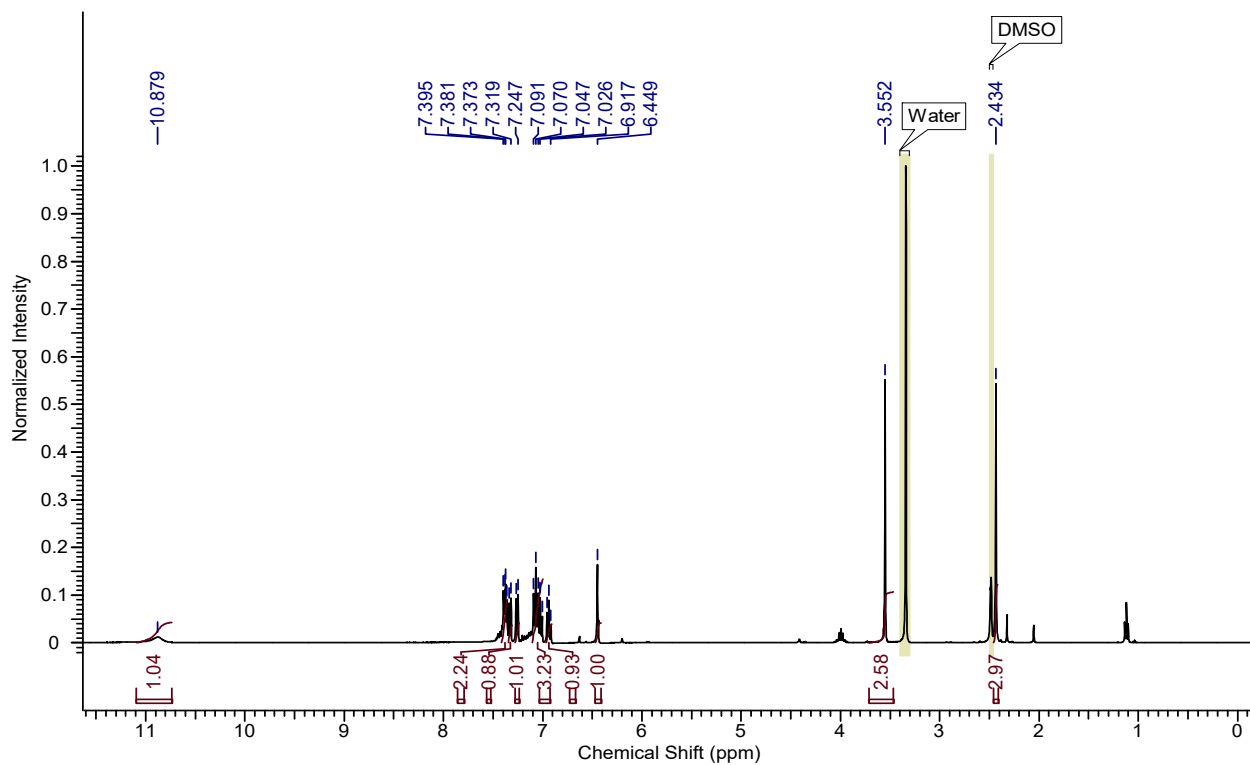

**<sup>13</sup>C NMR of (6c)**

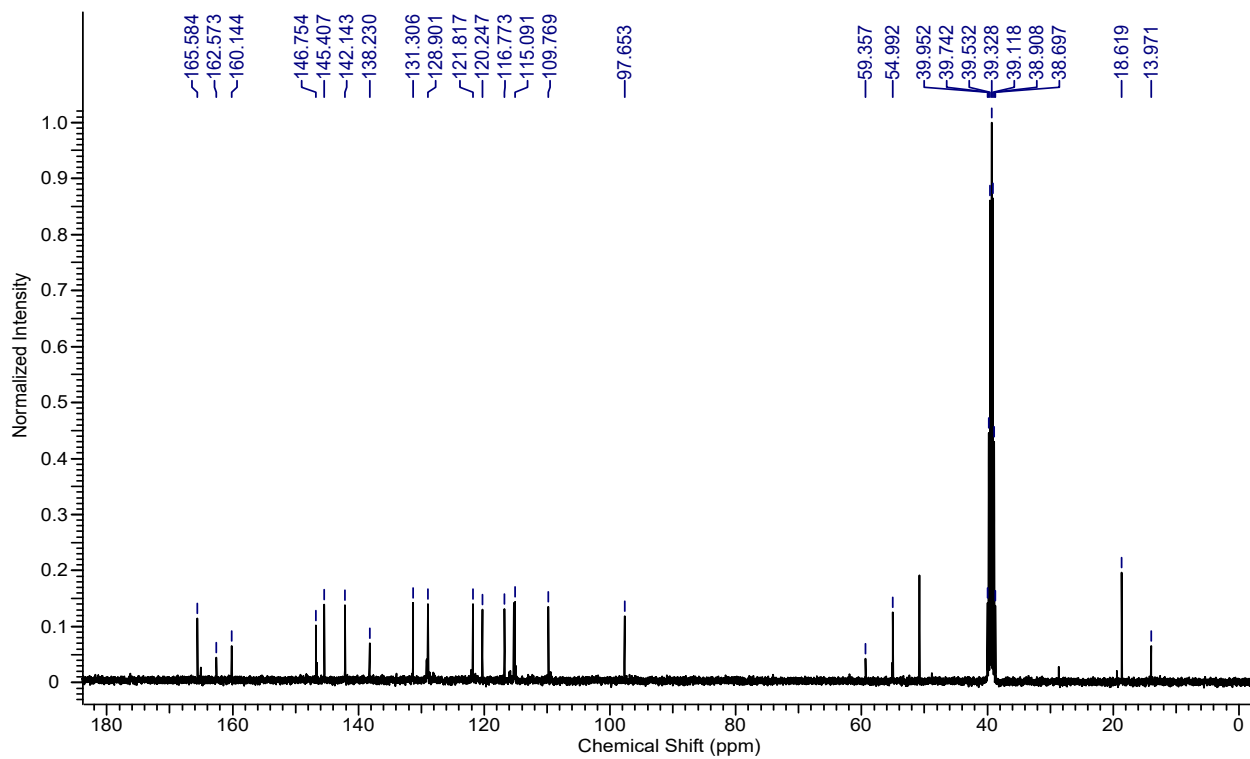

**<sup>1</sup>H NMR of (6d)**

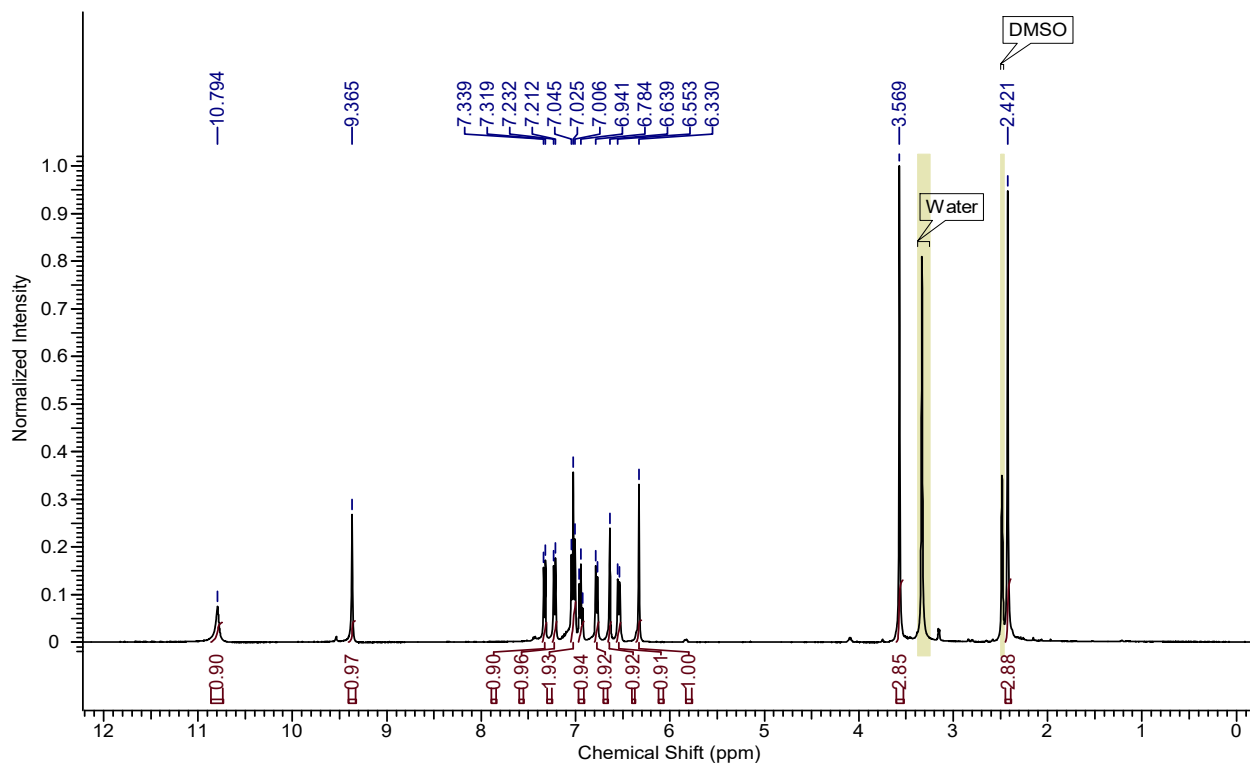

**<sup>13</sup>C NMR of (6d)**

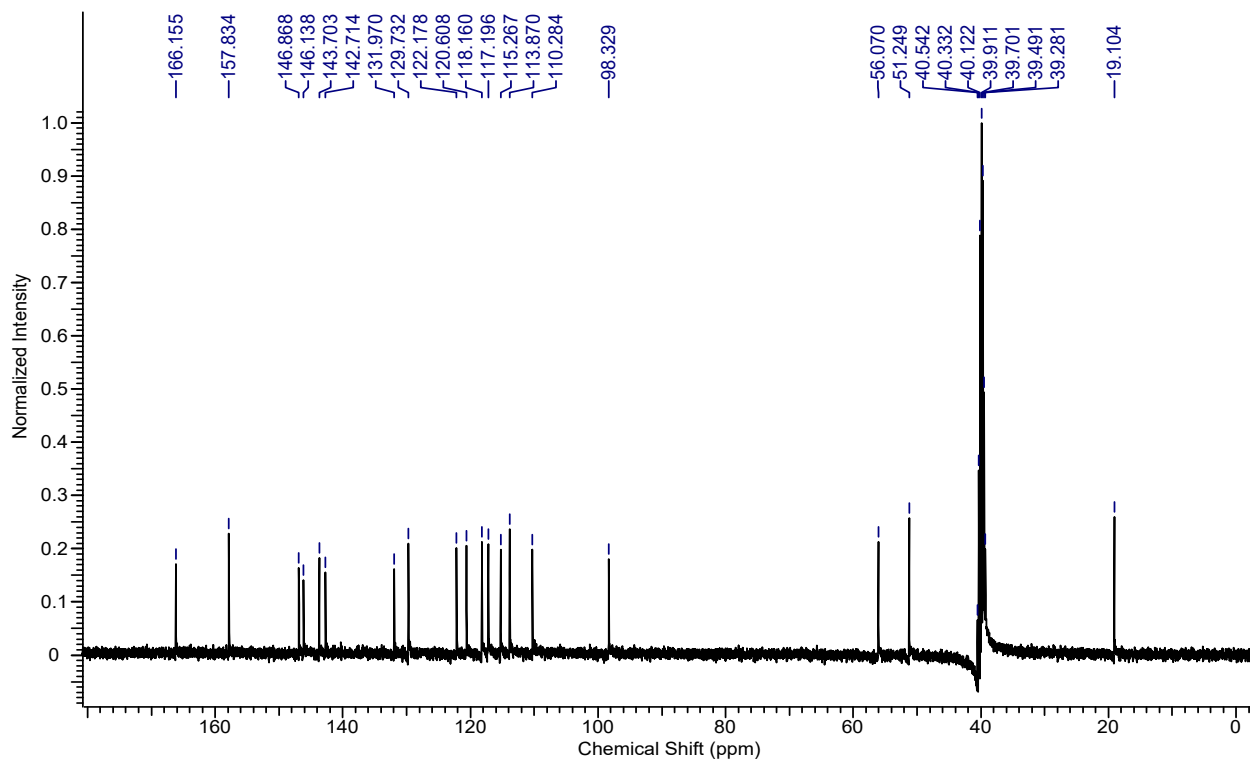

**<sup>1</sup>H NMR of (6e)**

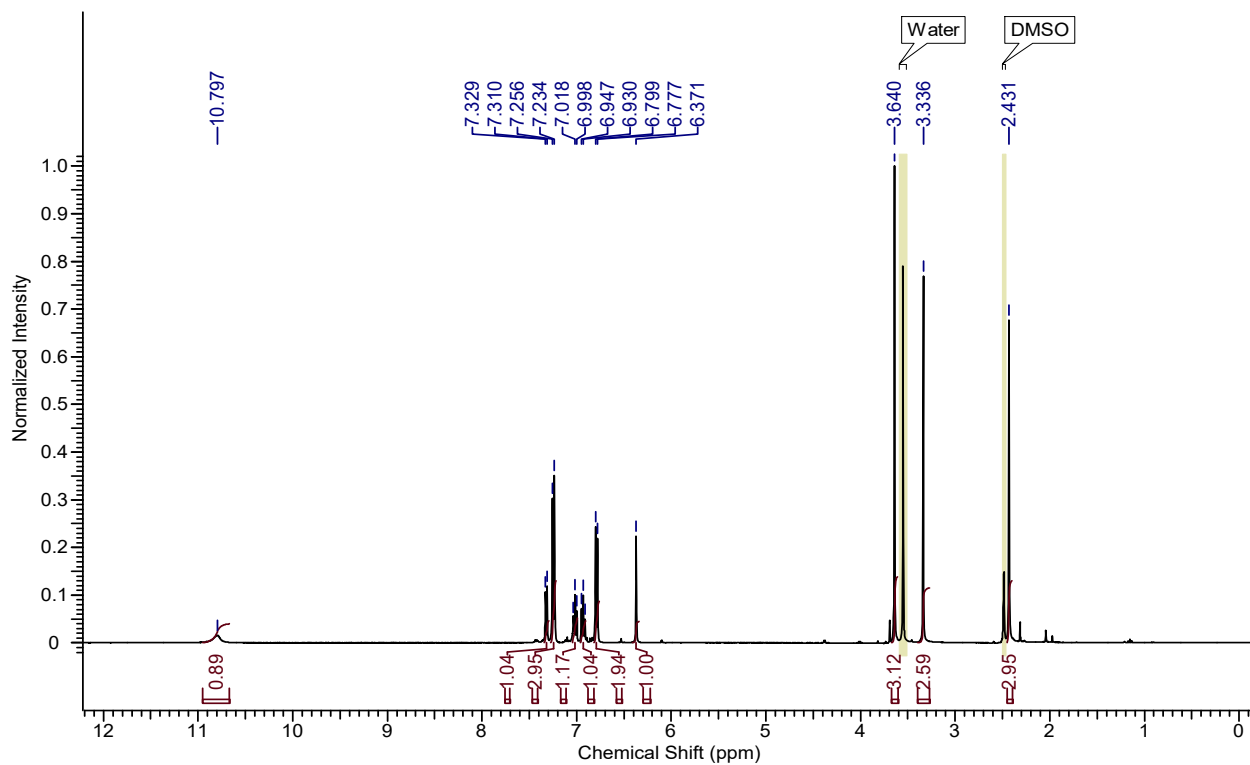

**<sup>13</sup>C NMR of (6e)**

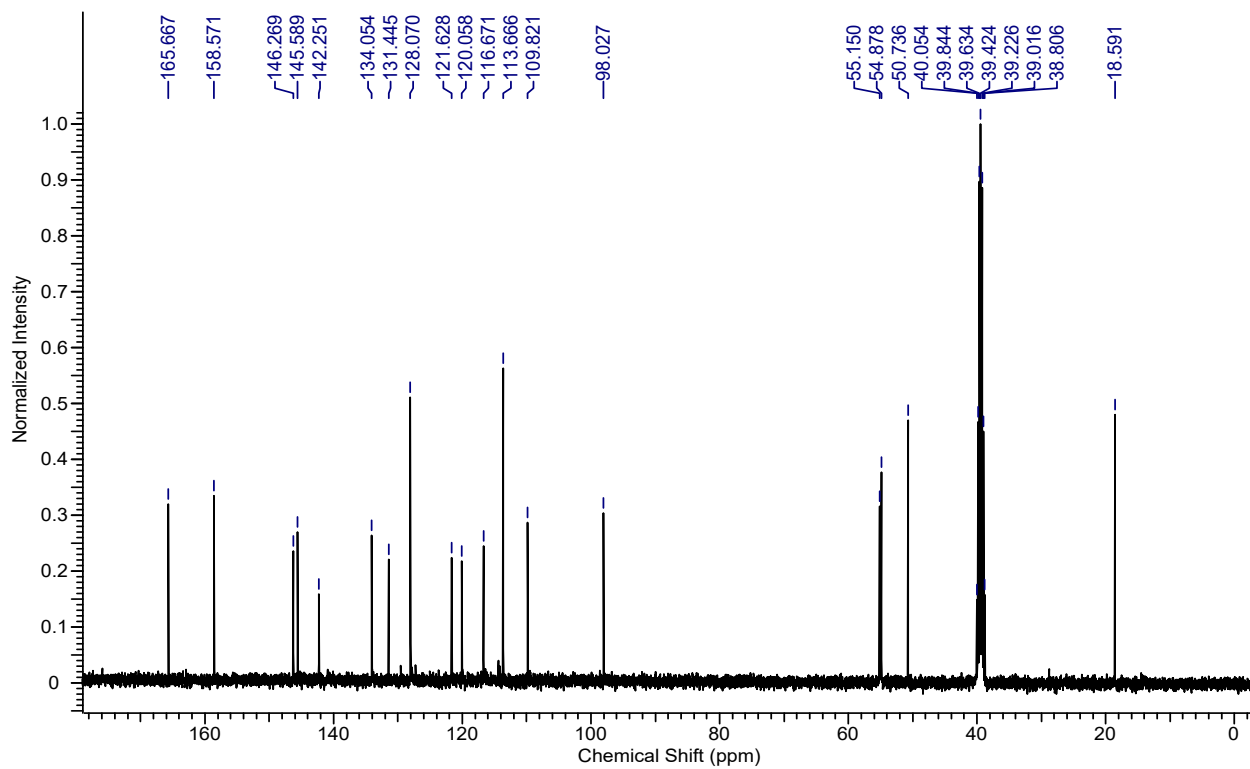

**<sup>1</sup>H NMR of (6f)**

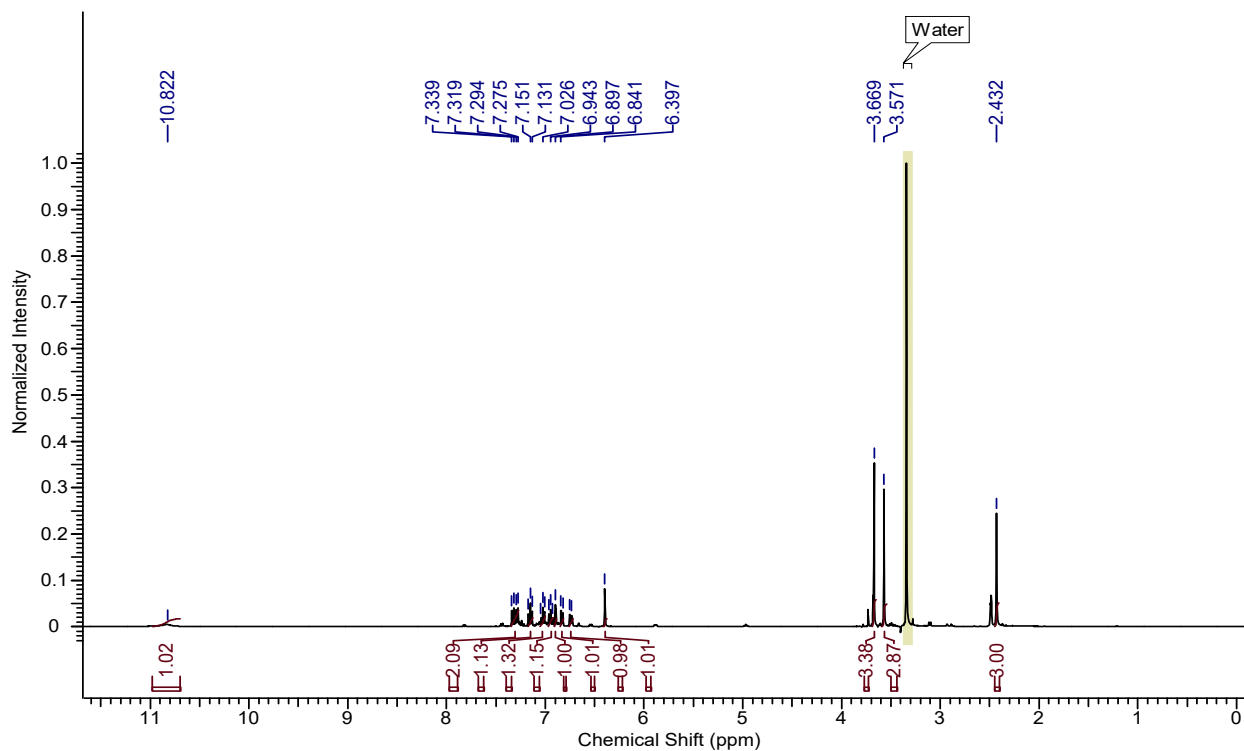

**<sup>13</sup>C NMR of (6f)**

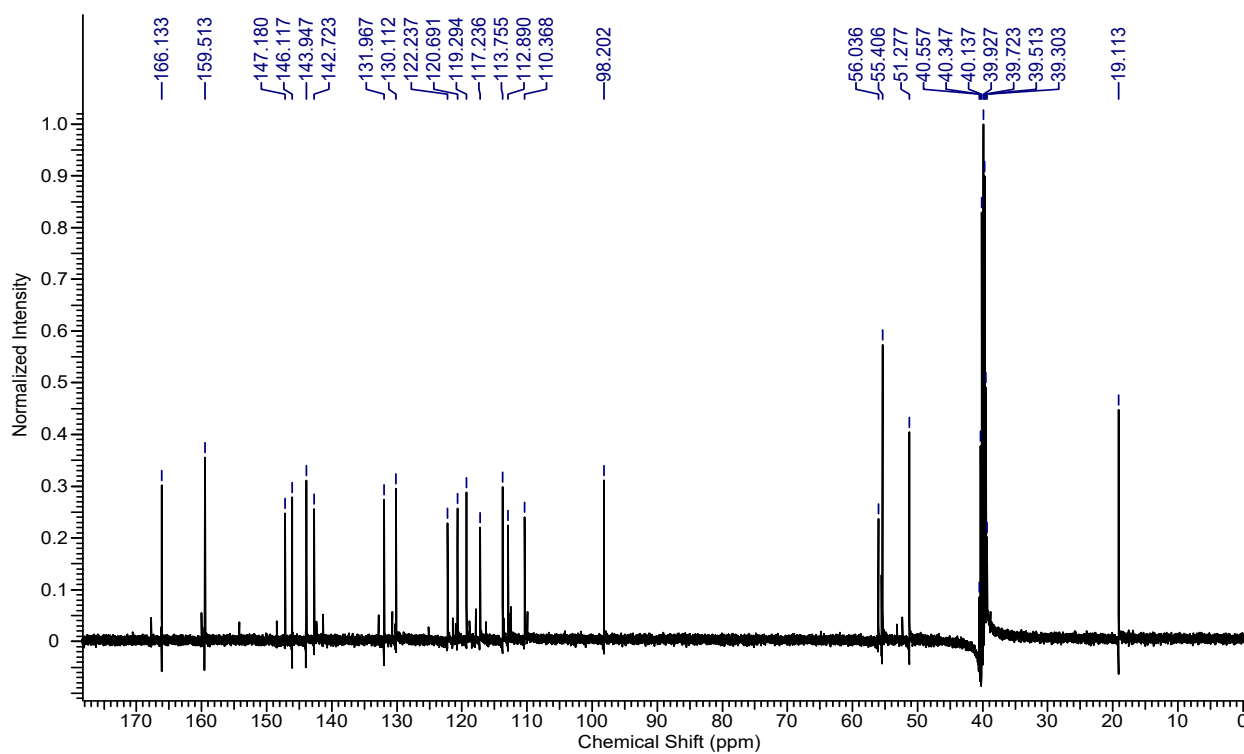

**<sup>1</sup>H NMR of (6g)**

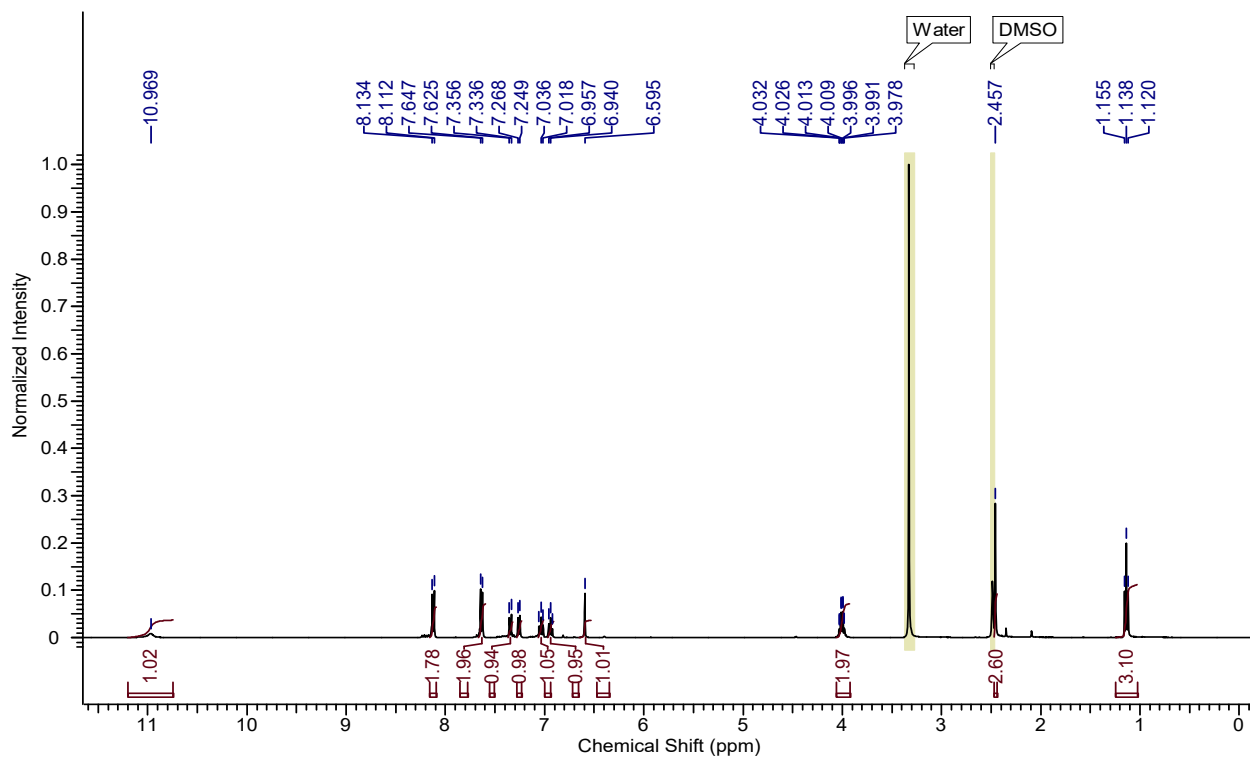

**<sup>13</sup>C NMR of (6g)**

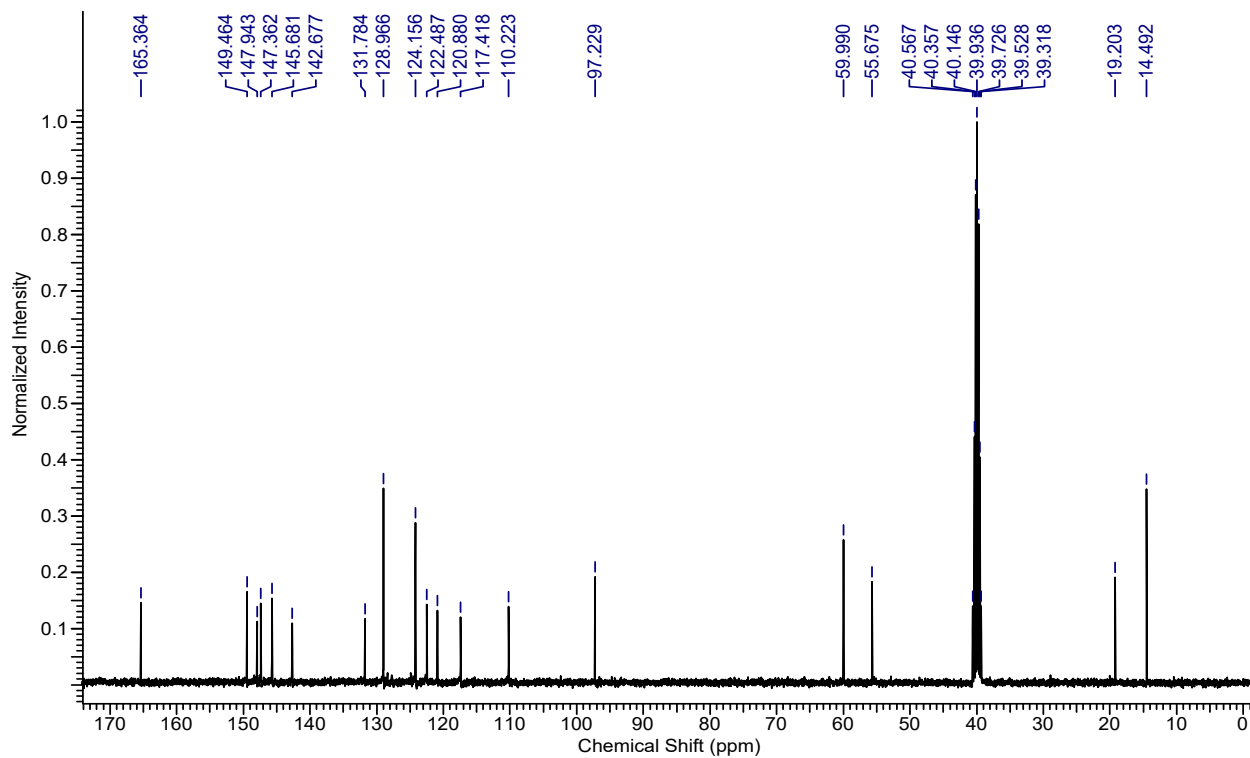

**<sup>1</sup>H NMR of (6h)**



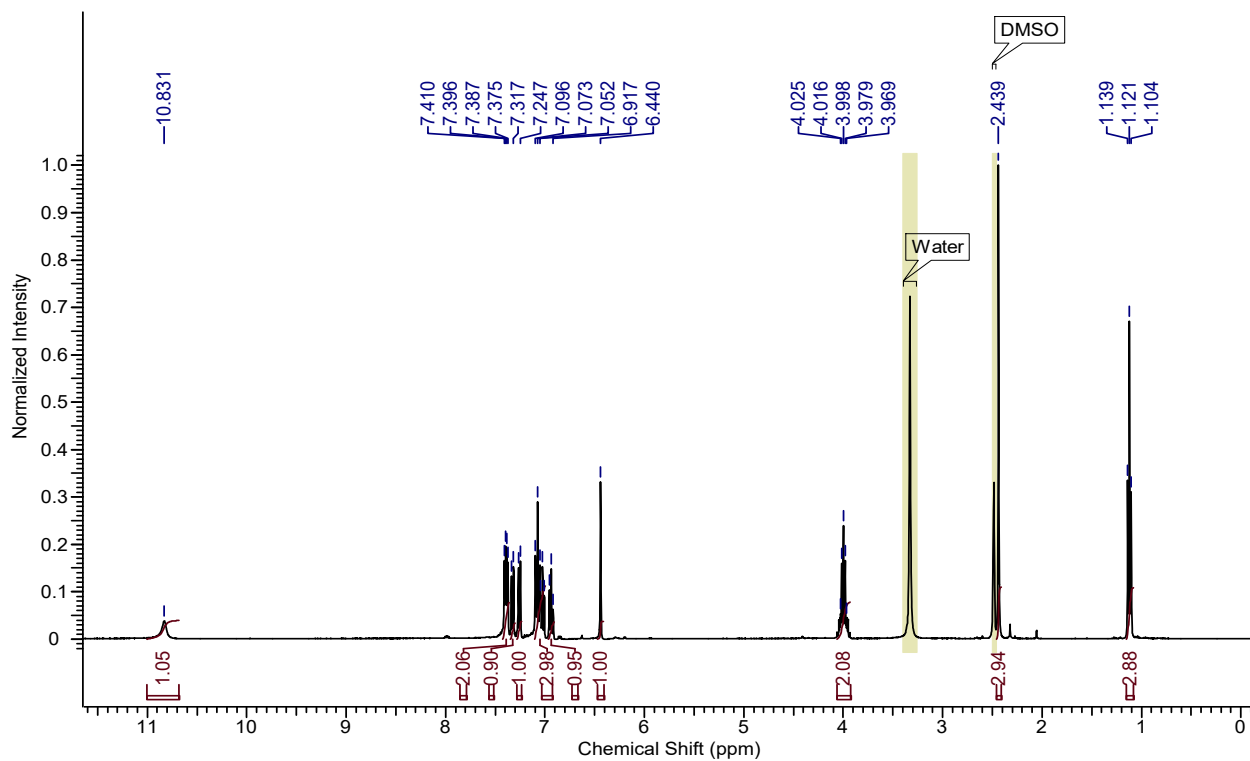

**<sup>13</sup>C NMR of (6h)**

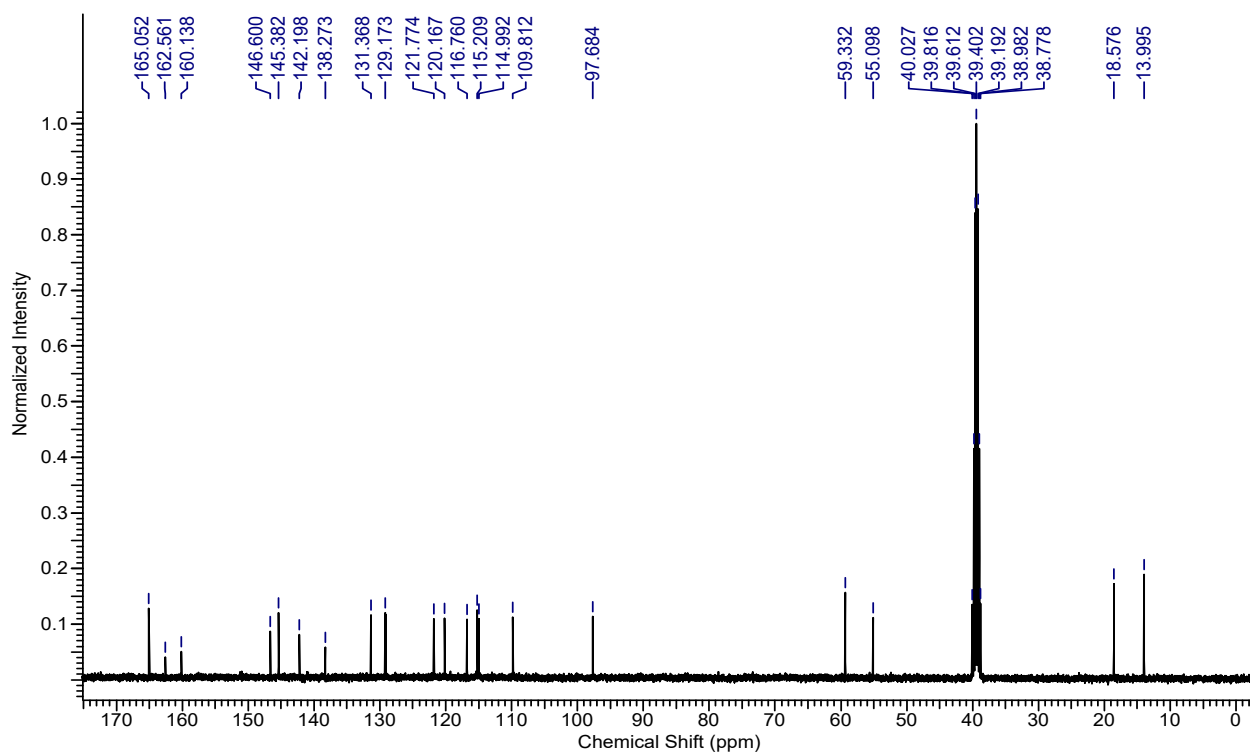

**<sup>1</sup>H NMR of (6i)**

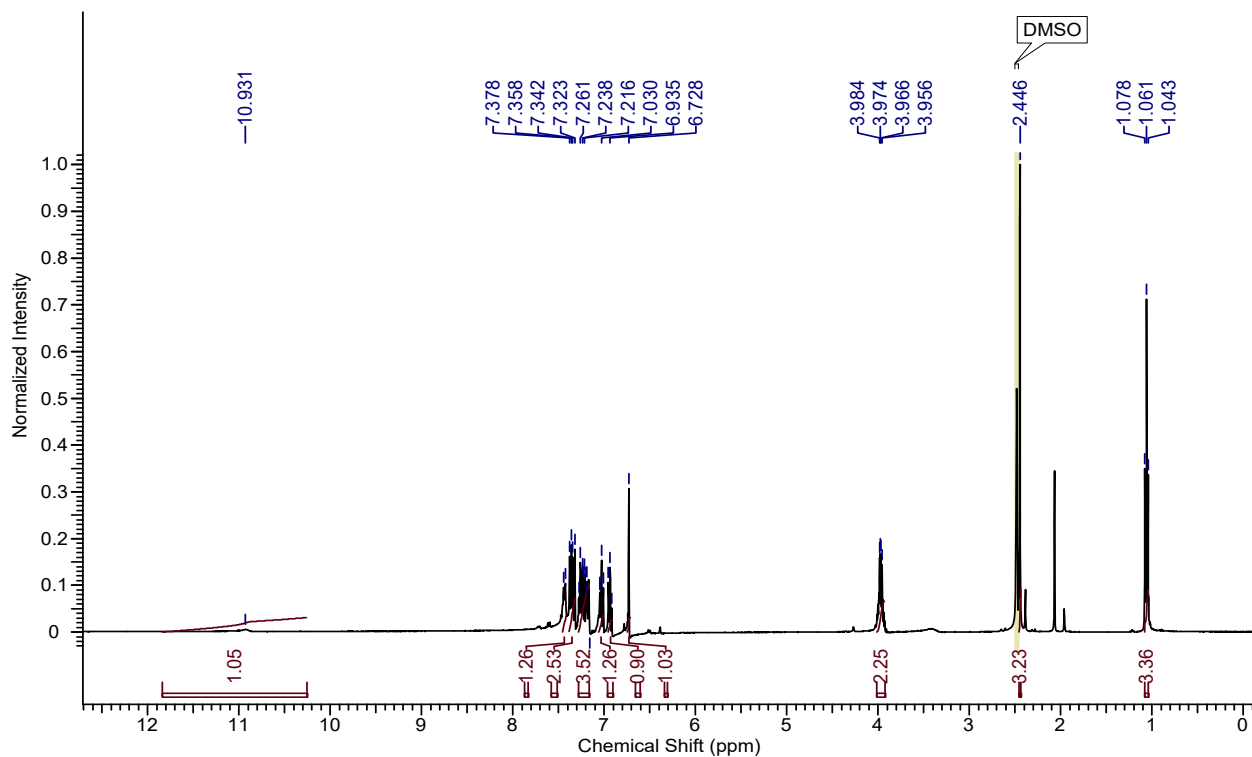

**<sup>13</sup>C NMR of (6i)**

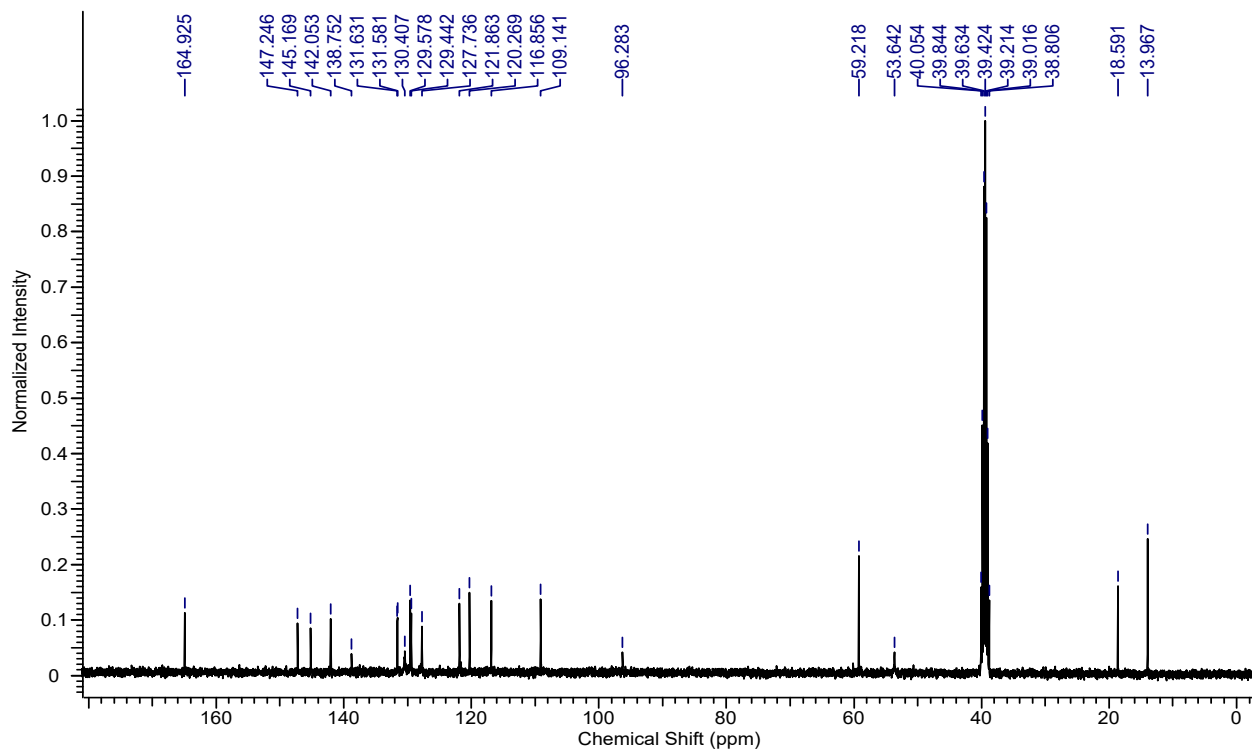

**<sup>1</sup>H NMR of (6j)**

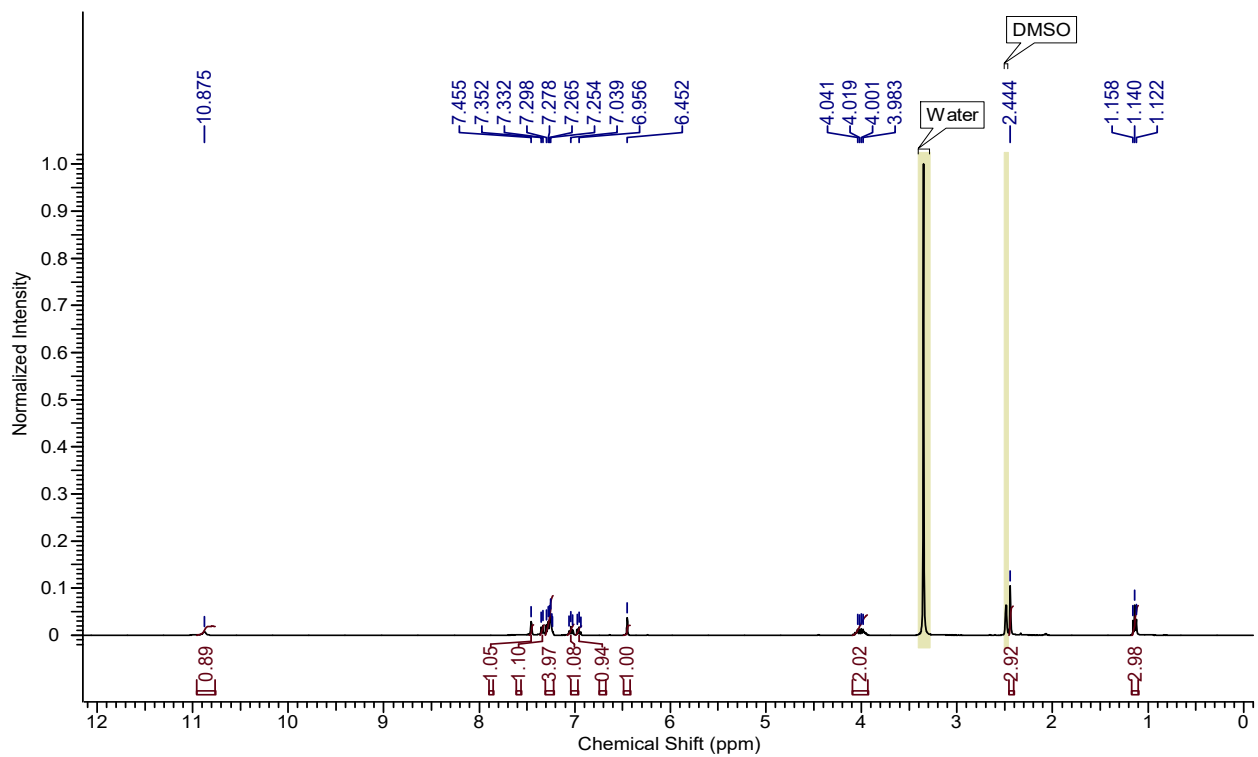

**<sup>13</sup>C NMR of (6j)**

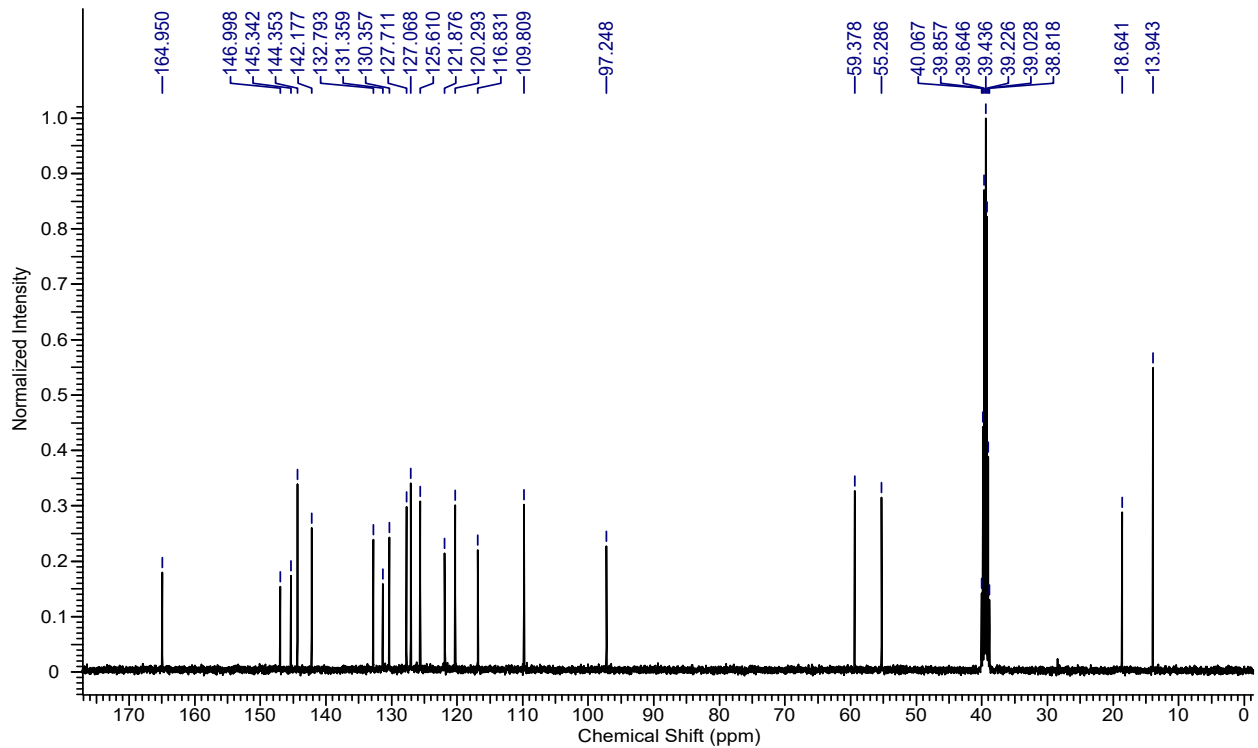

**<sup>1</sup>H NMR of (6k)**

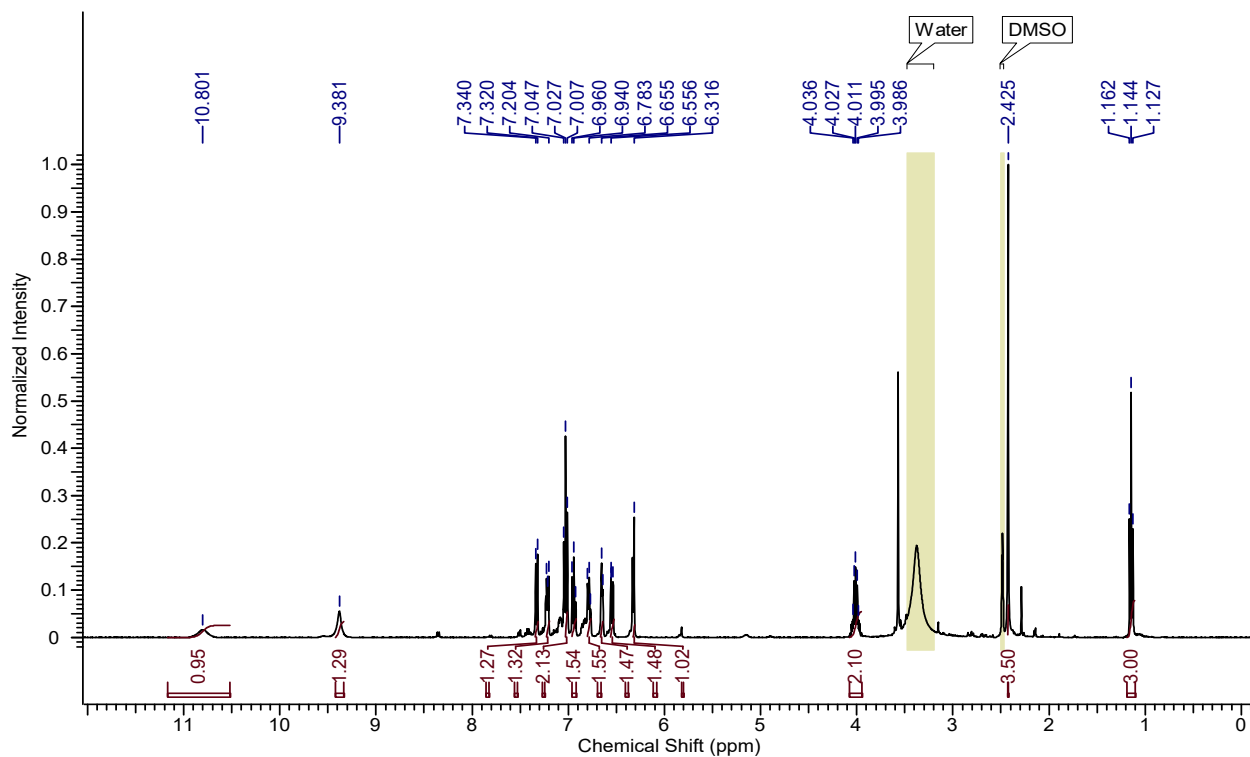

**<sup>13</sup>C NMR of (6k)**

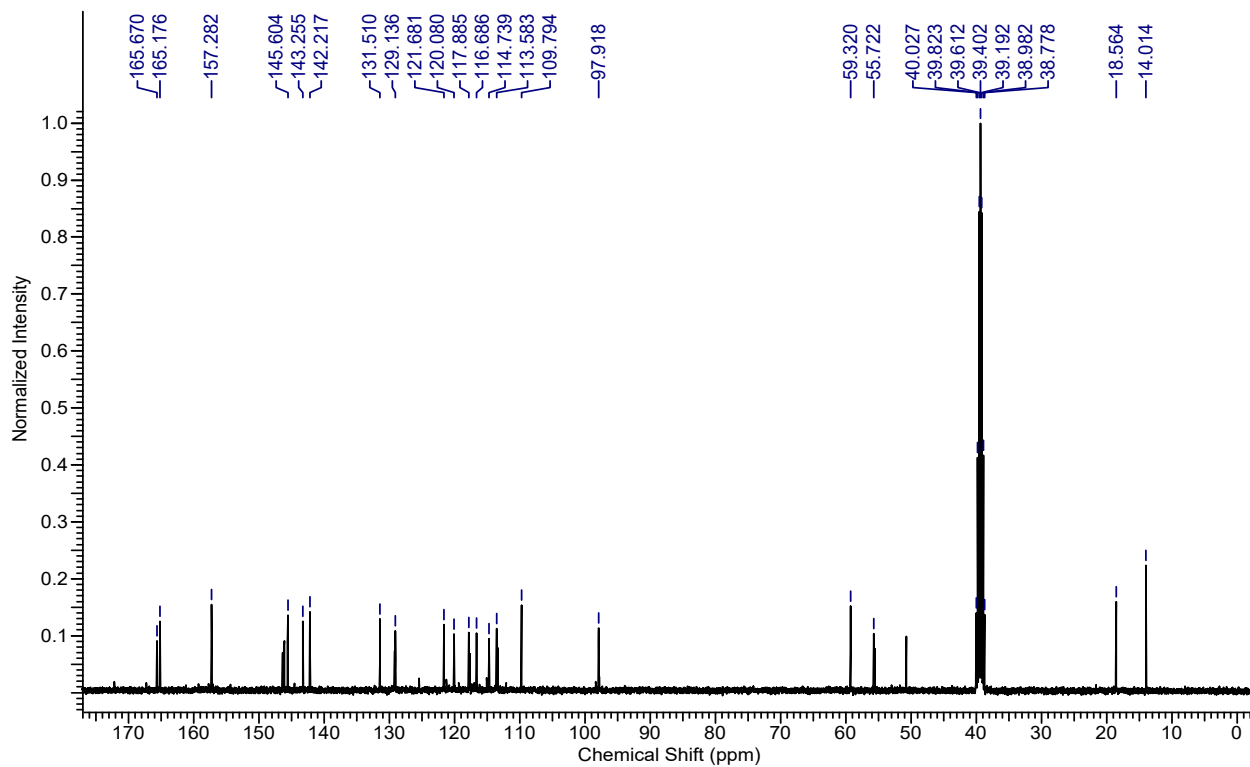

**<sup>1</sup>H NMR of (6l)**

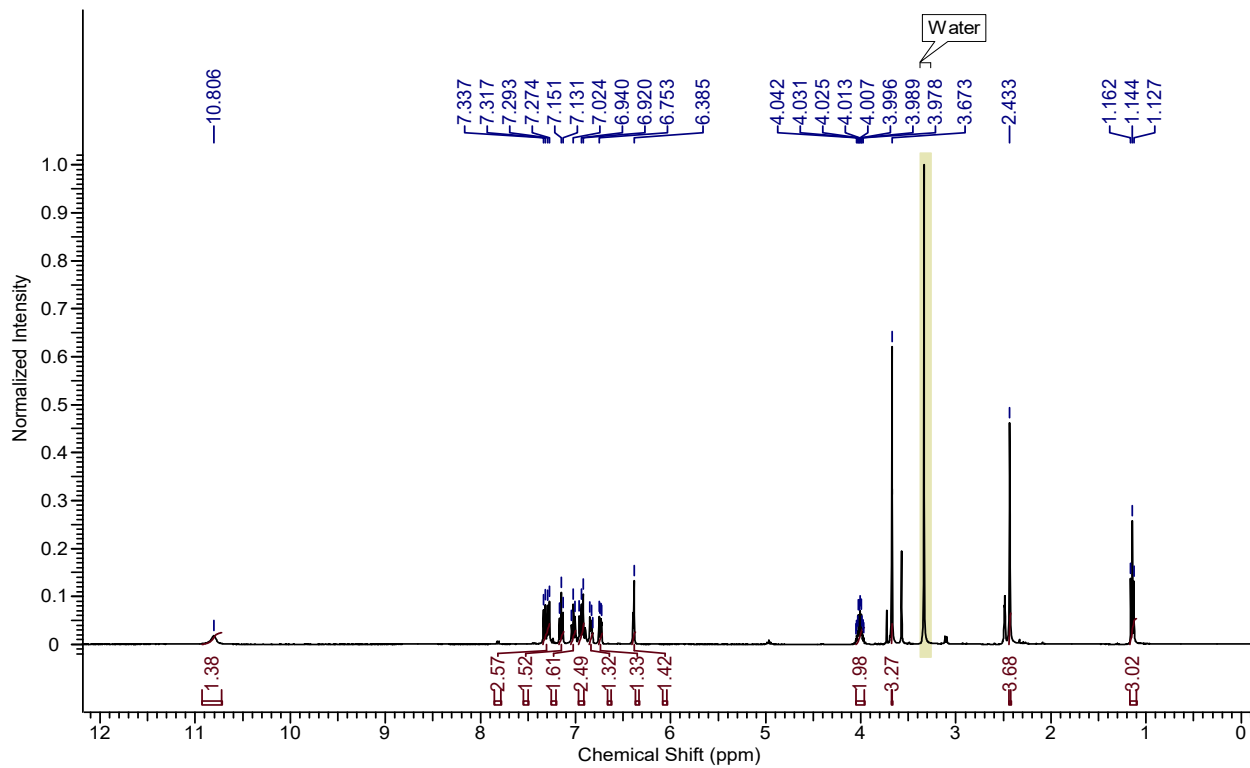

**<sup>13</sup>C NMR of (6l)**

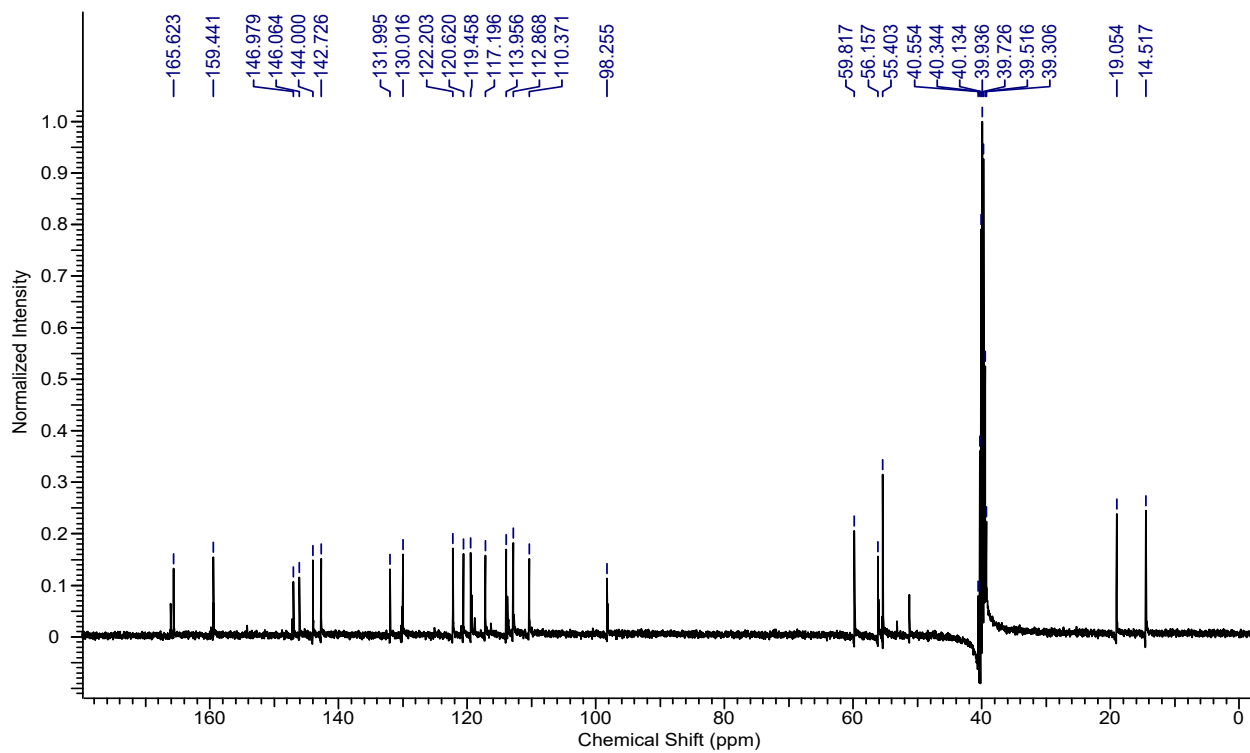

**<sup>1</sup>H NMR of (6m)**

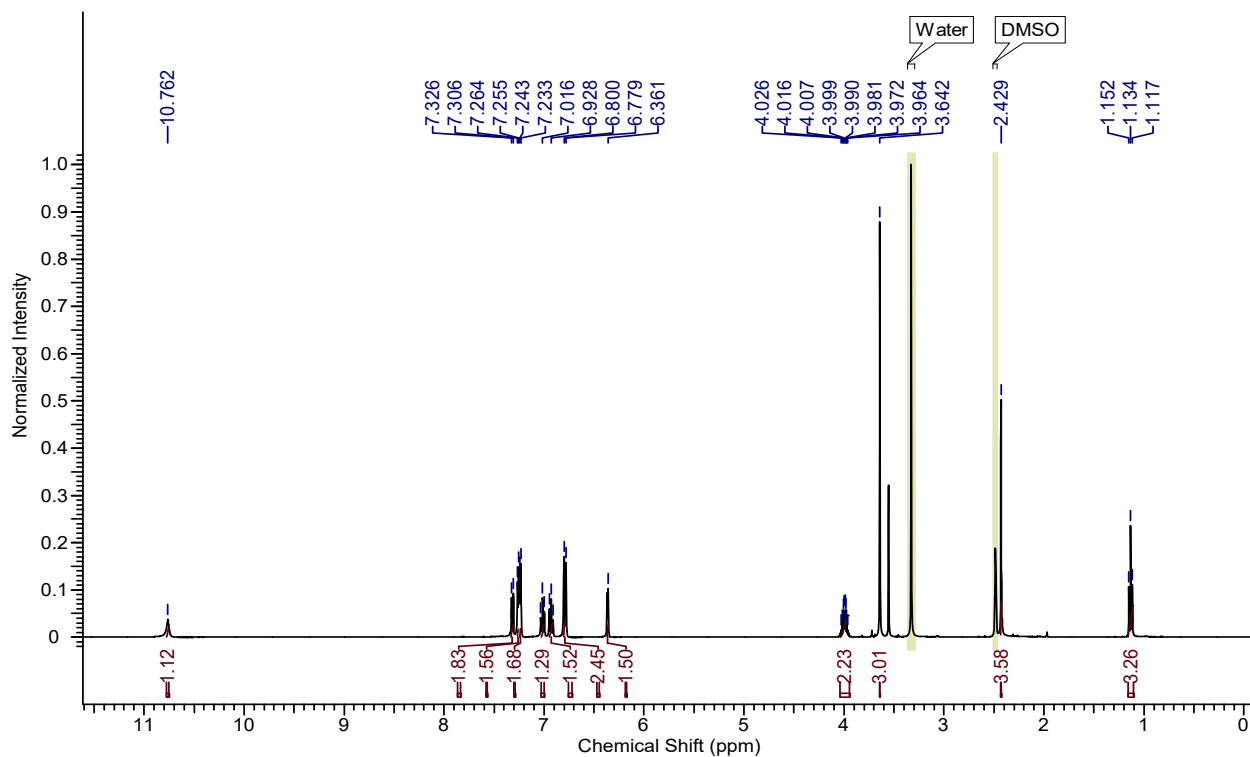

**<sup>13</sup>C NMR of (6m)**

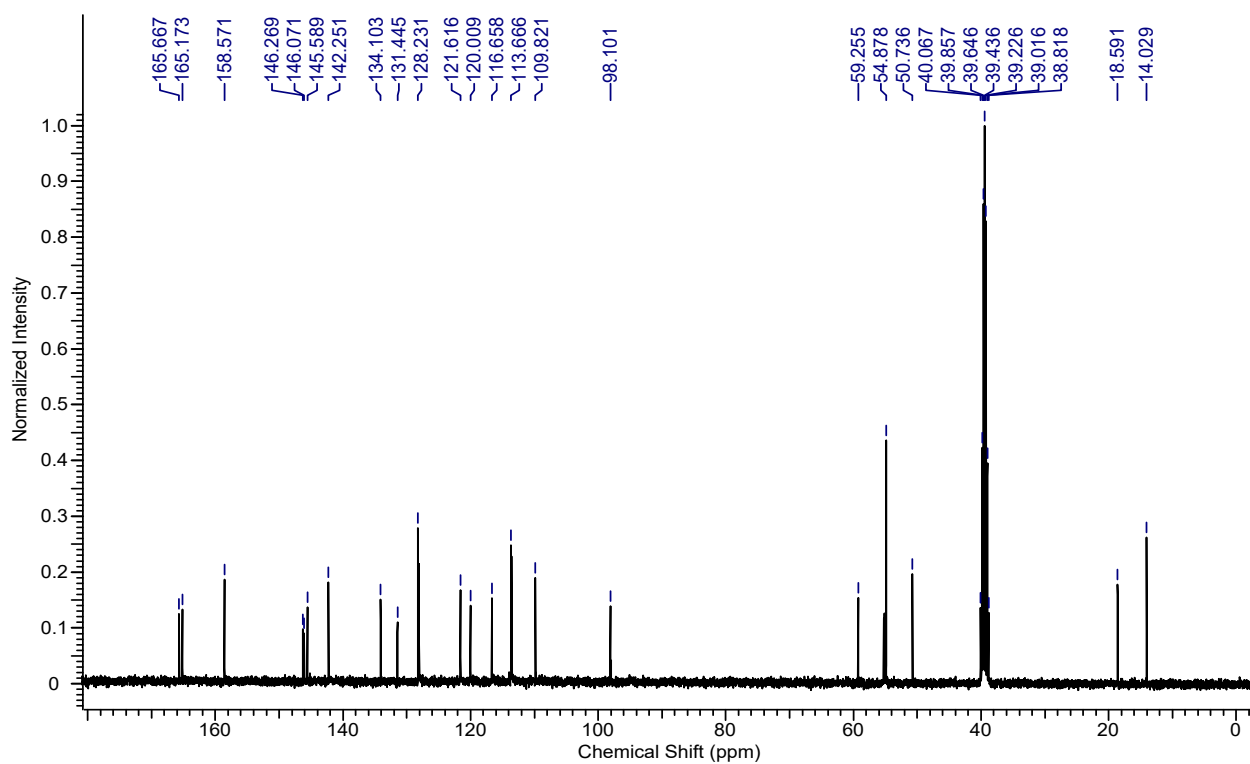

**<sup>1</sup>H NMR of (6n)**

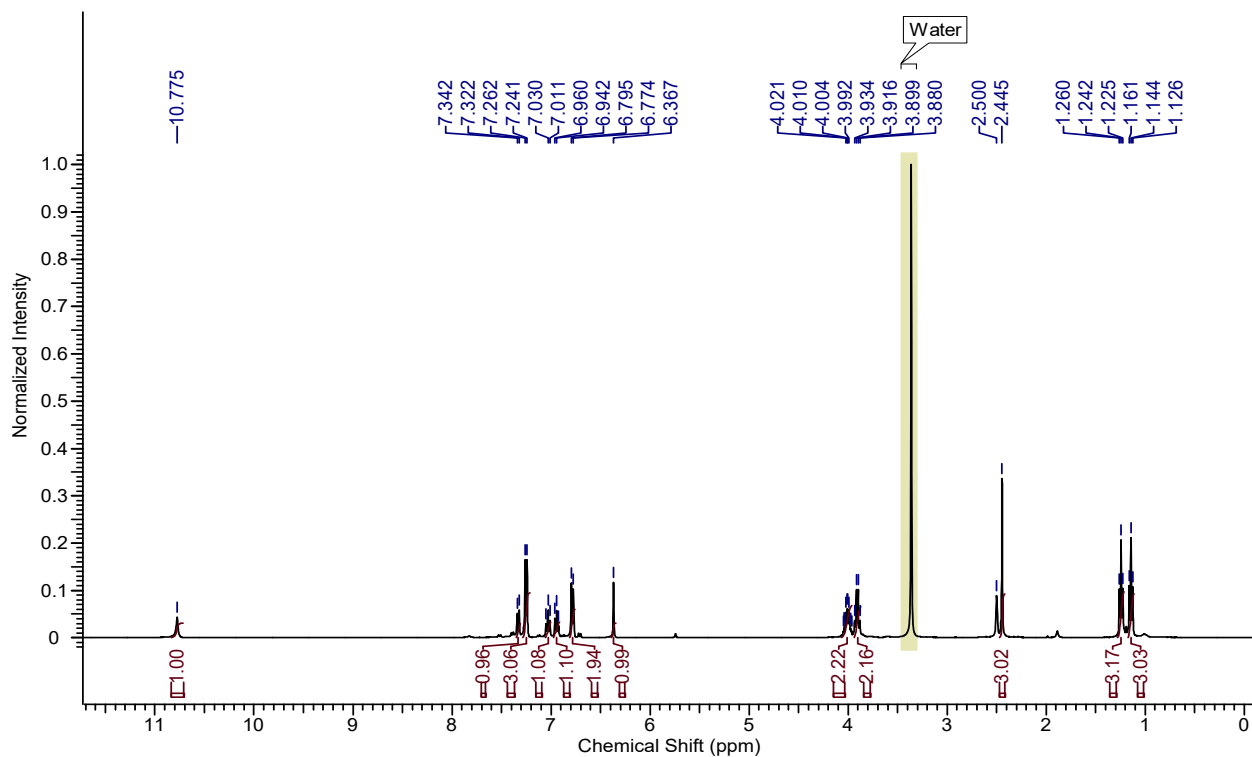

**<sup>13</sup>C NMR of (6n)**

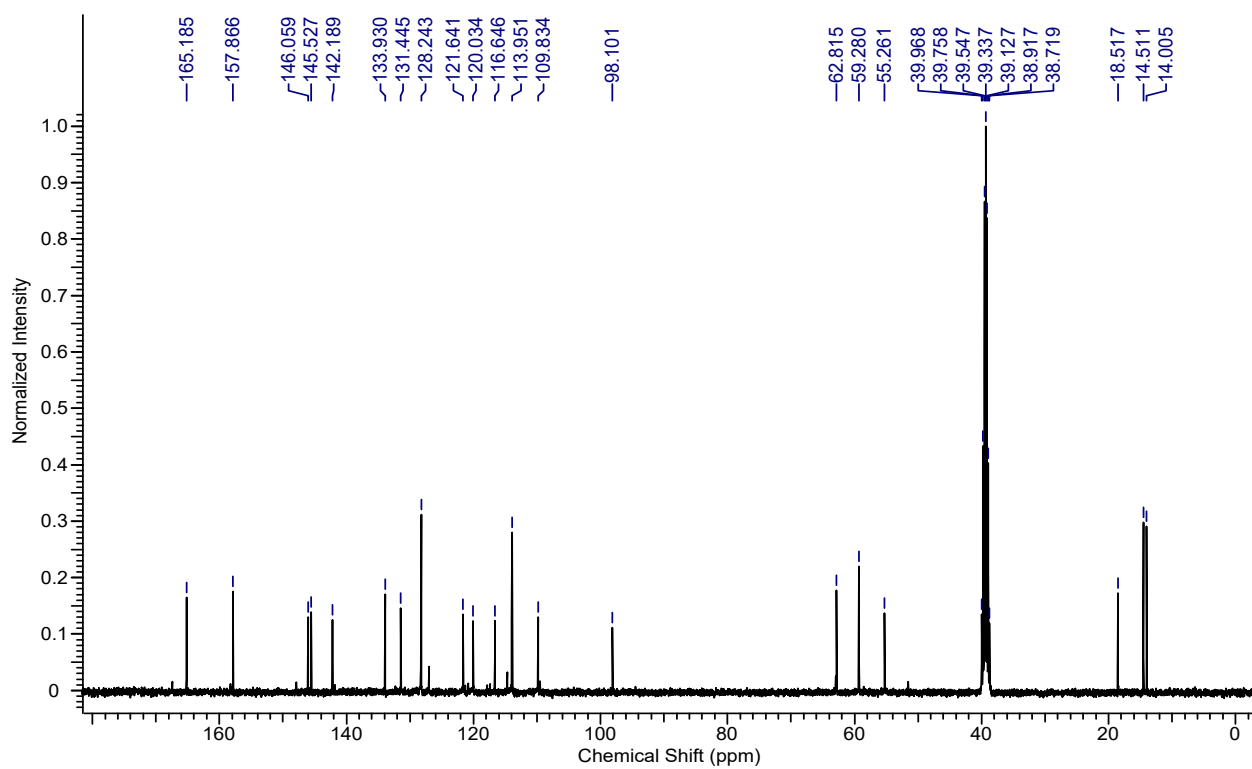

**<sup>1</sup>H NMR of (8a)**

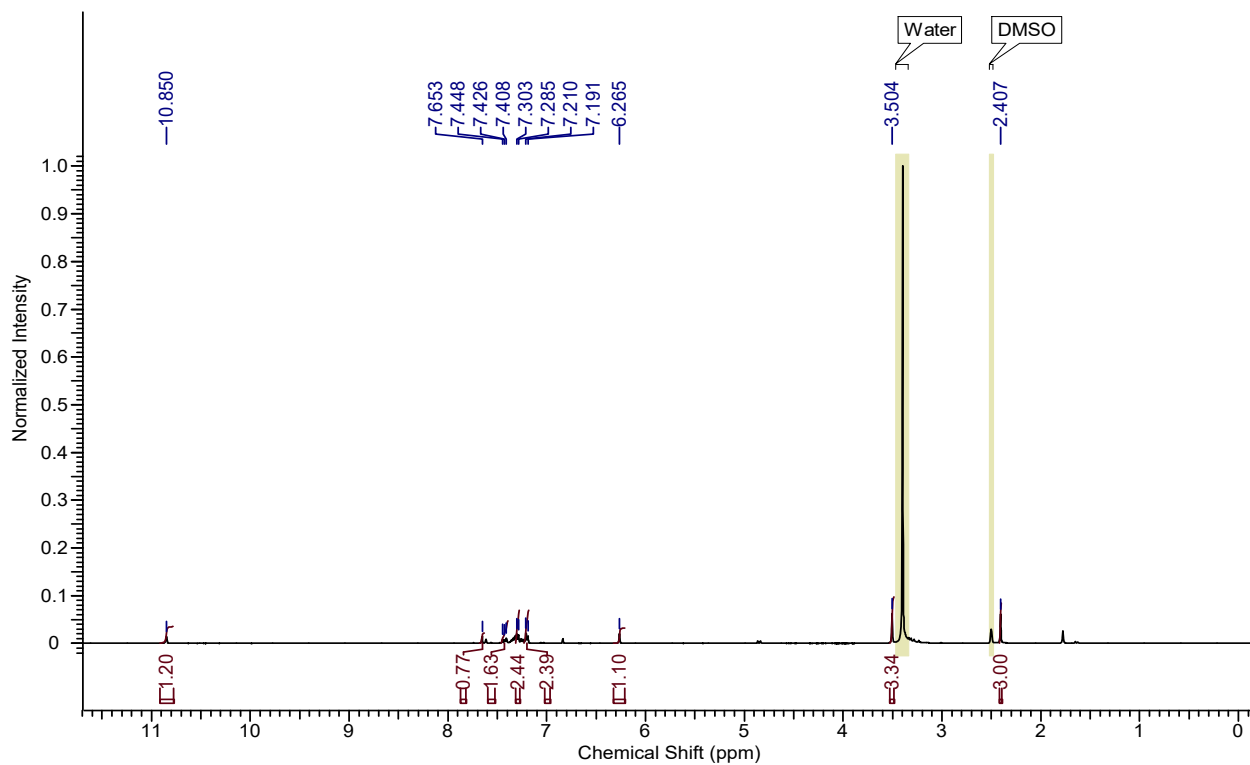

**<sup>13</sup>C NMR of (8a)**

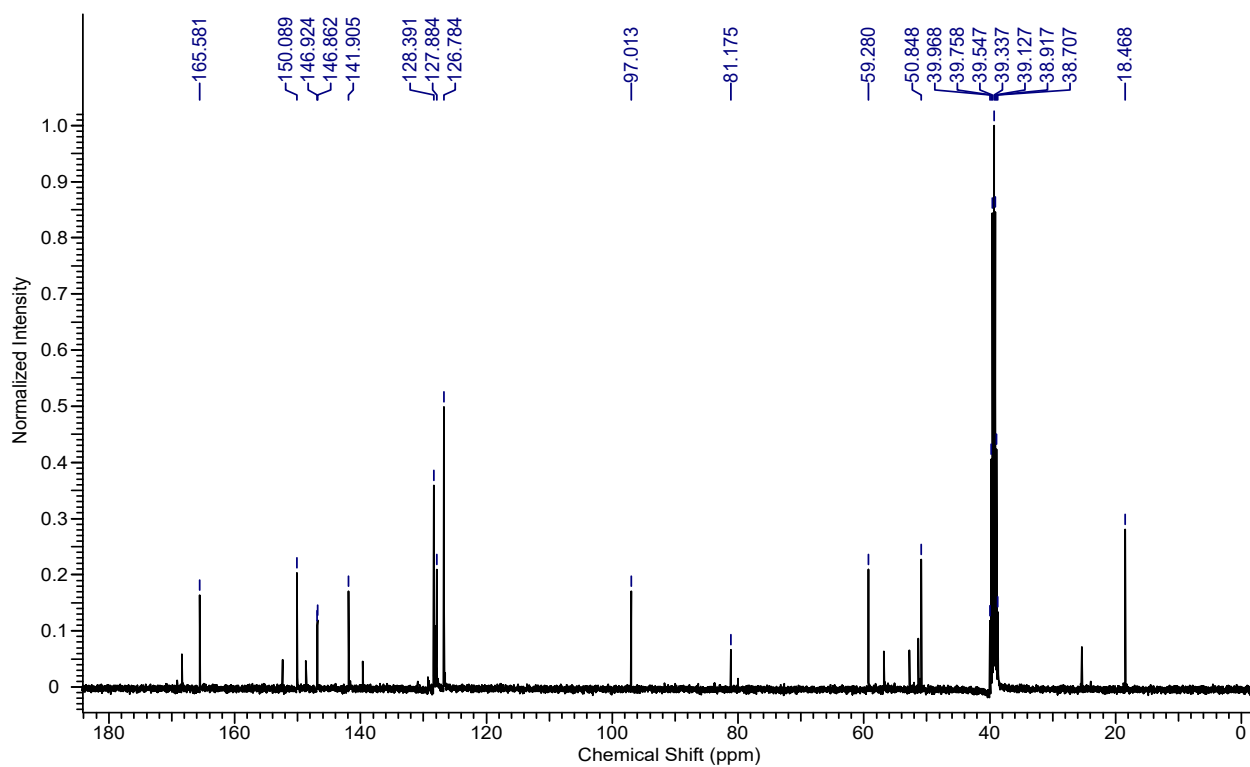

**<sup>1</sup>H NMR of (8b)**



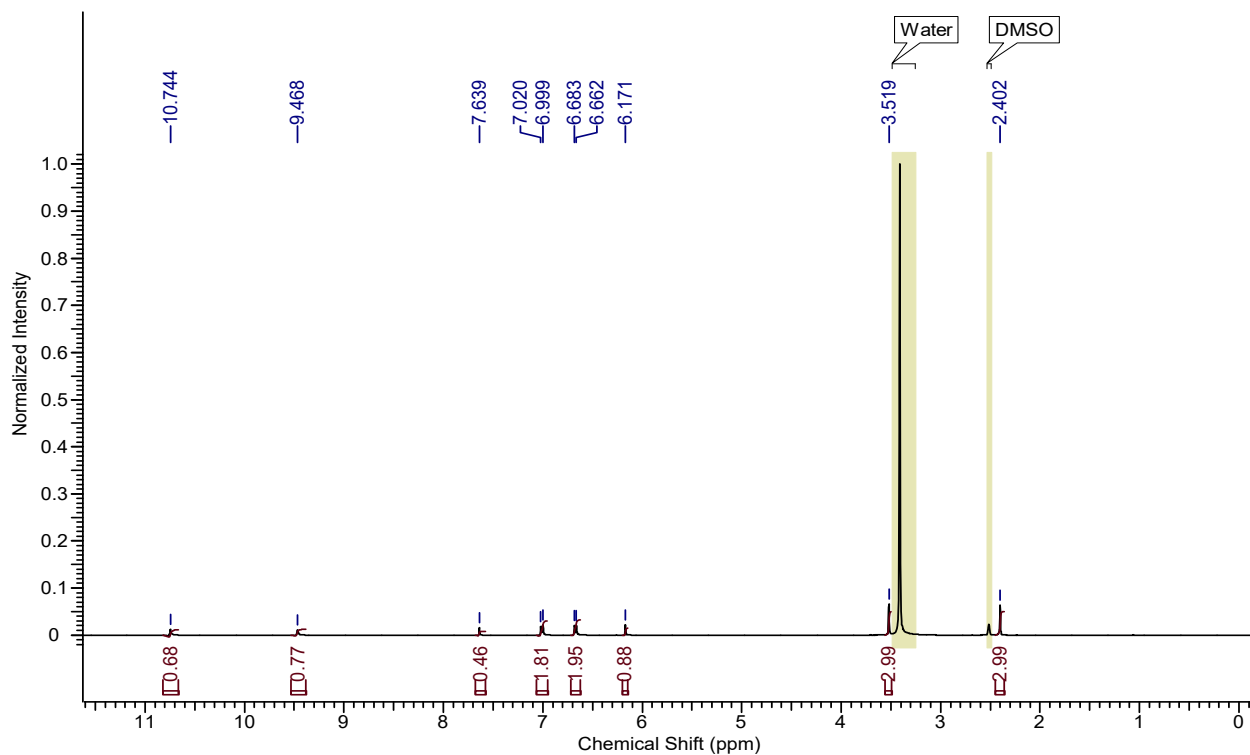

**<sup>13</sup>C NMR of (8b)**

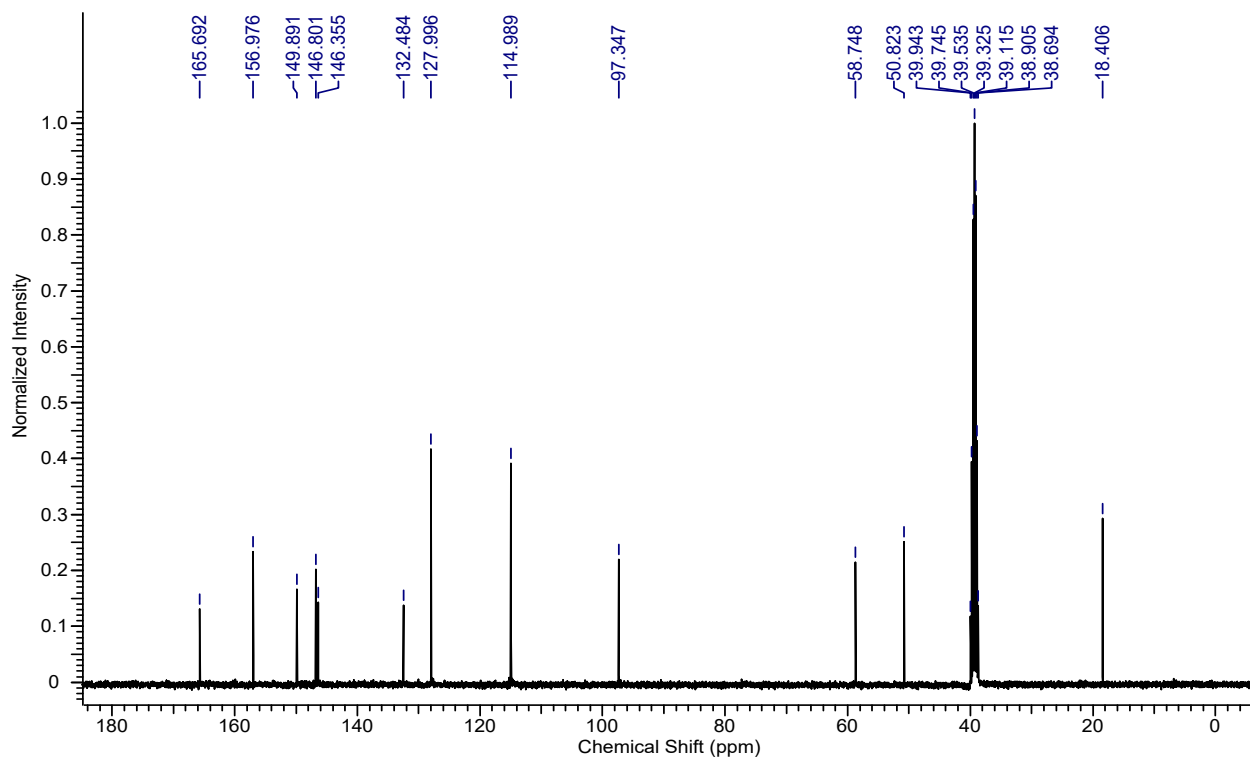

**<sup>1</sup>H NMR of (8c)**

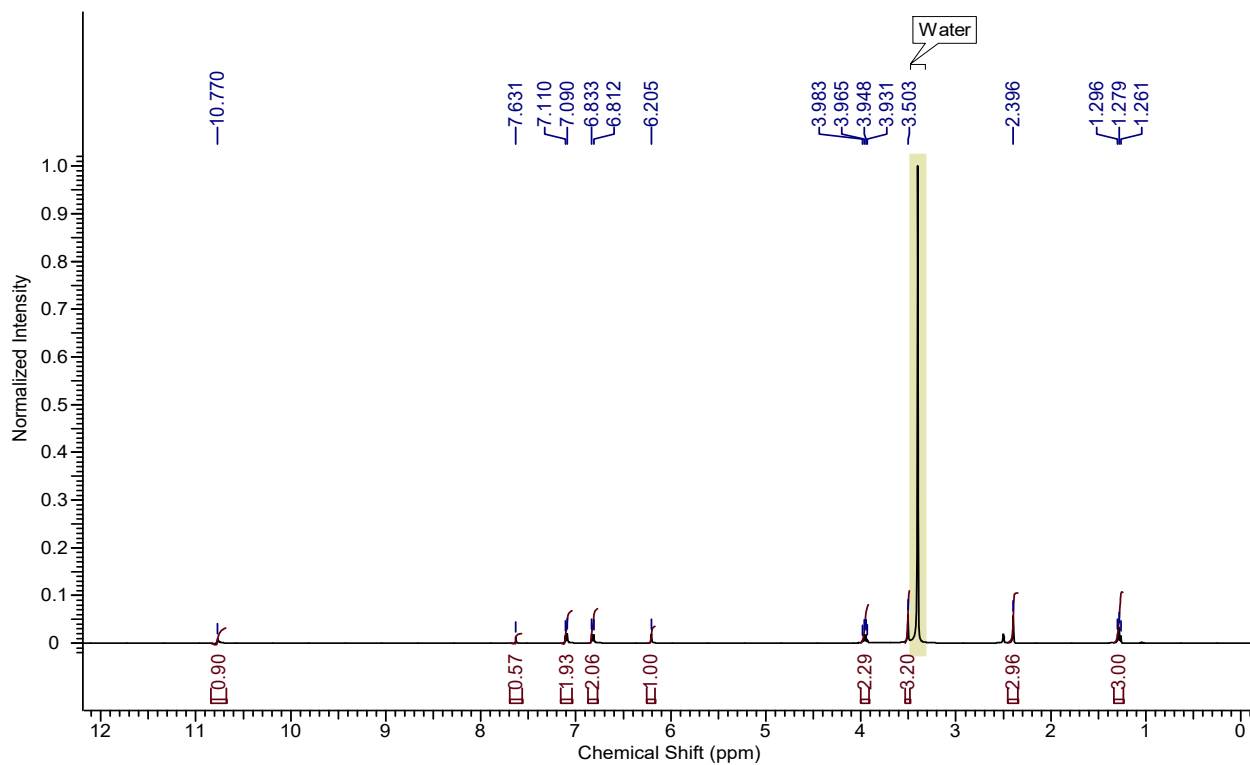

**<sup>13</sup>C NMR of (8c)**

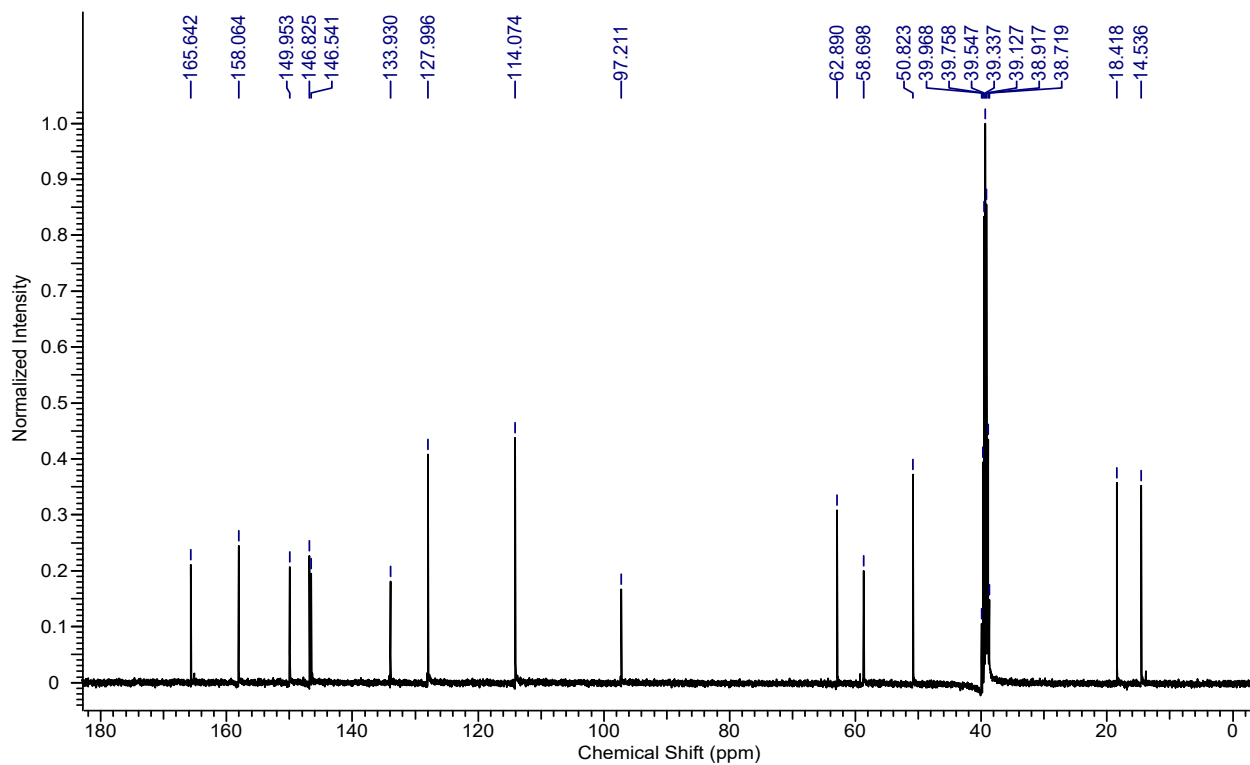

**<sup>1</sup>H NMR of (8d)**

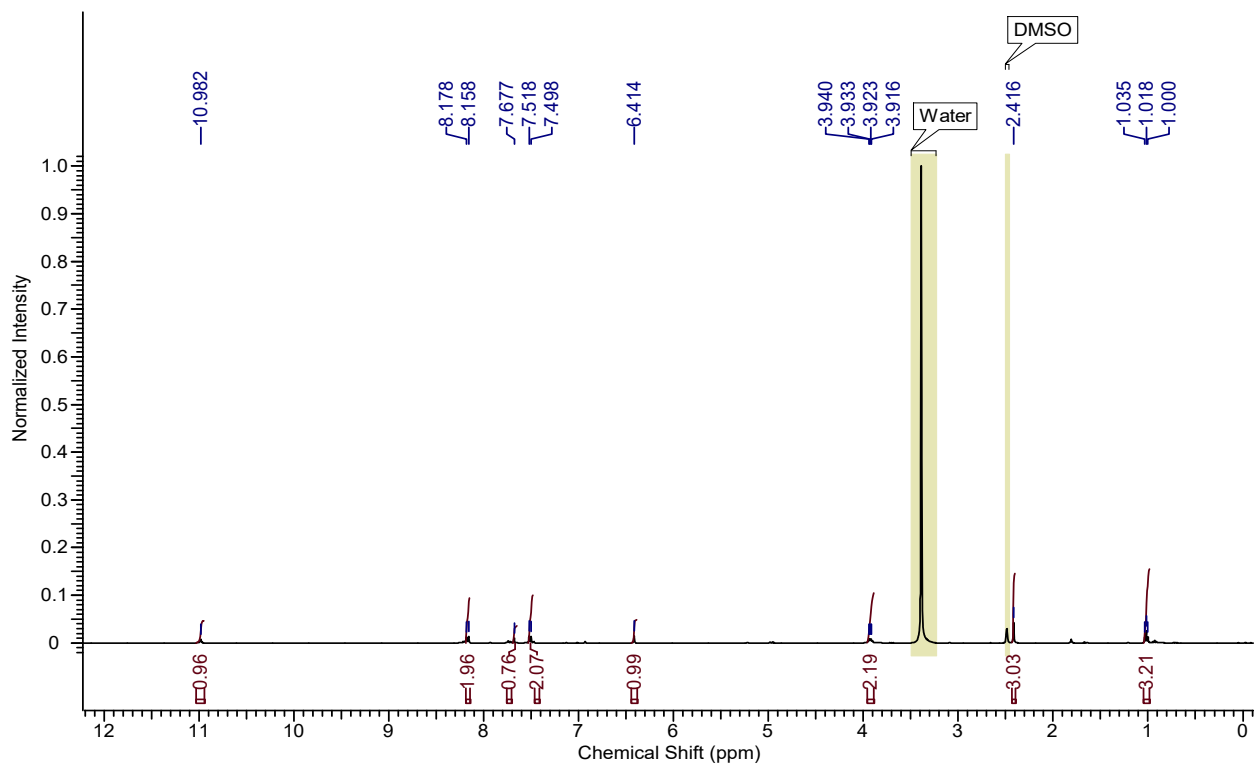

**<sup>13</sup>C NMR of (8d)**

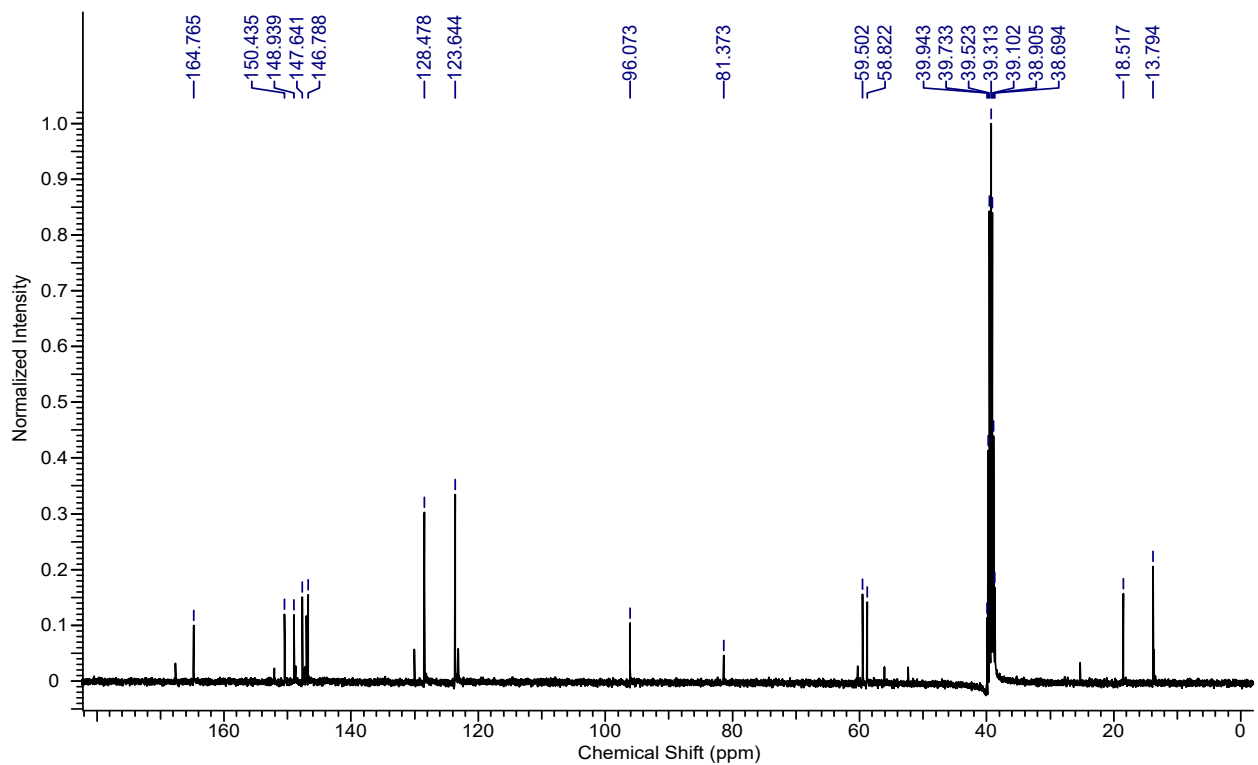

**<sup>1</sup>H NMR of (8e)**

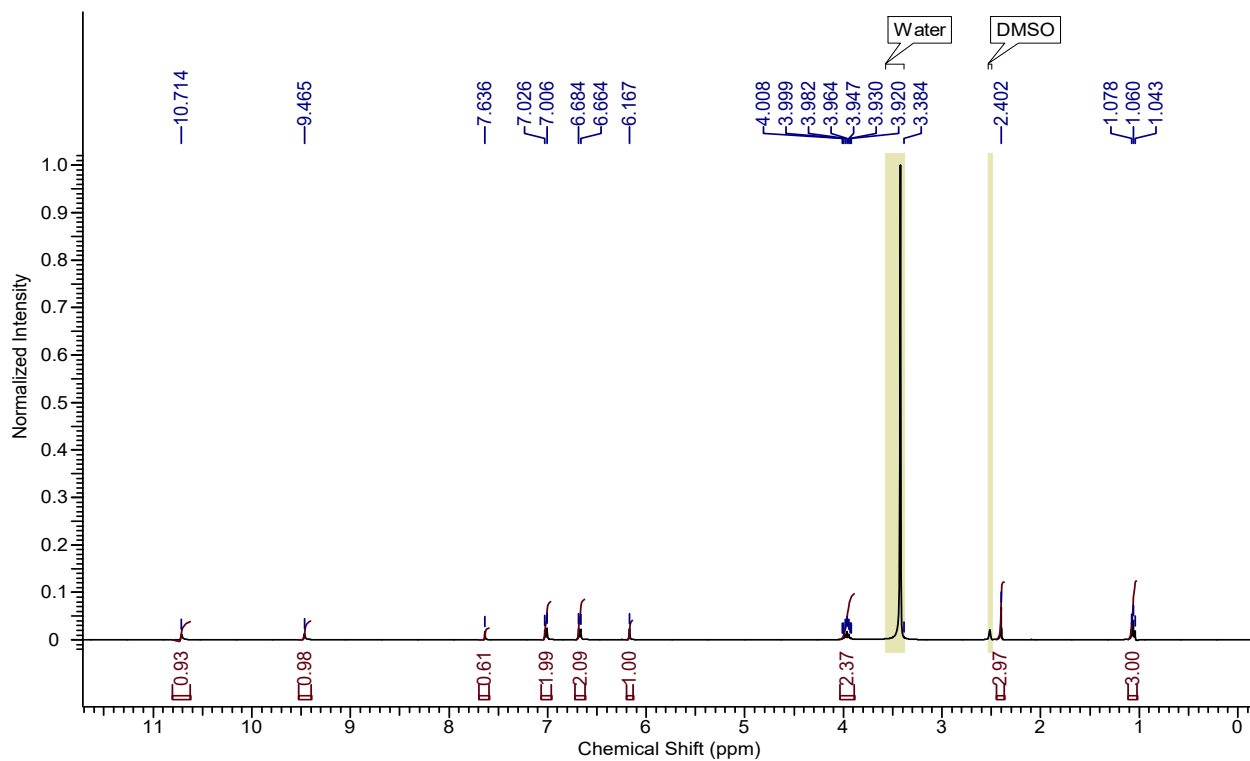

**<sup>13</sup>C NMR of (8e)**

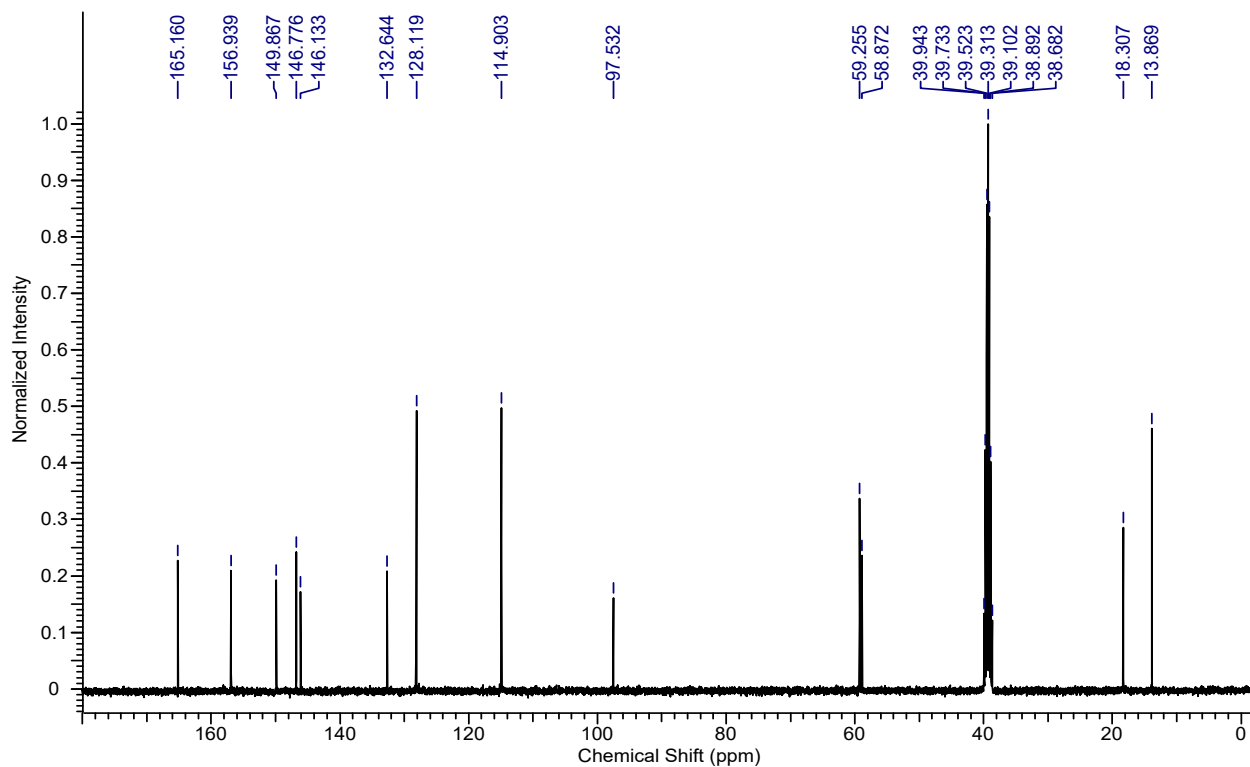

**Table-1:** In-vitro anthelmintic activity of benzimidazole derivatives against *S. obvelata*. All data are expressed as mean  $\pm$  SEM. All data are statistically significant at  $p \leq 0.005$  followed by Tukey's test

| Benzimidazole derivatives | R                                | R1                                                | <i>S.obvelata</i> Paralysis Time at 200 | <i>S.obvelata</i> MortalityTime at 200 $\mu$ g/ml | <i>S.obvelata</i> Paralysis Time at 800 | <i>S.obvelata</i> MortalityTime at 800 $\mu$ g/ml |
|---------------------------|----------------------------------|---------------------------------------------------|-----------------------------------------|---------------------------------------------------|-----------------------------------------|---------------------------------------------------|
| 6b                        | OCH <sub>3</sub>                 | 4-Br-C <sub>6</sub> H <sub>4</sub>                | 9.83 $\pm$ .21                          | 12.25 $\pm$ .32                                   | 10.08 $\pm$ .13                         | 10.41 $\pm$ .54                                   |
| 6c                        | OCH <sub>3</sub>                 | 4-F-C <sub>6</sub> H <sub>4</sub>                 | 13.50 $\pm$ .71                         | 16.5 $\pm$ .17                                    | 10.91 $\pm$ .48                         | 12.41 $\pm$ .48                                   |
| 6d                        | OCH <sub>3</sub>                 | 3-OH-C <sub>6</sub> H <sub>4</sub>                | 7.41 $\pm$ .47                          | 9.66 $\pm$ .15                                    | 6.83 $\pm$ .26                          | 8.50 $\pm$ .24                                    |
| 6e                        | OCH <sub>3</sub>                 | 4-OCH <sub>3</sub> -C <sub>6</sub> H <sub>4</sub> | 15.08 $\pm$ .33                         | 18.58 $\pm$ .57                                   | 12.75 $\pm$ .12                         | 16.16 $\pm$ .16                                   |
| 6f                        | OCH <sub>3</sub>                 | 3-OCH <sub>3</sub> -C <sub>6</sub> H <sub>4</sub> | 16.66 $\pm$ .74                         | 20.08 $\pm$ .22                                   | 12.33 $\pm$ .79                         | 14.83 $\pm$ .44                                   |
| 6h                        | OCH <sub>2</sub> CH <sub>3</sub> | 4-F-C <sub>6</sub> H <sub>4</sub>                 | 10.58 $\pm$ .23                         | 13.25 $\pm$ .33                                   | 10.16 $\pm$ .33                         | 11.83 $\pm$ .25                                   |
| 6i                        | OCH <sub>2</sub> CH <sub>3</sub> | 2-Cl-C <sub>6</sub> H <sub>4</sub>                | 13.33 $\pm$ .66                         | 15.75 $\pm$ .27                                   | 12.75 $\pm$ .54                         | 14.16 $\pm$ .16                                   |
| 6j                        | OCH <sub>2</sub> CH <sub>3</sub> | 3-Cl-C <sub>6</sub> H <sub>4</sub>                | 12.41 $\pm$ .27                         | 14.83 $\pm$ .52                                   | 10.08 $\pm$ .19                         | 11.66 $\pm$ .23                                   |
| 6k                        | OCH <sub>2</sub> CH <sub>3</sub> | 3-OH-C <sub>6</sub> H <sub>4</sub>                | 8.91 $\pm$ .35                          | 10.91 $\pm$ .11                                   | 7.41 $\pm$ .37                          | 8.33 $\pm$ .07                                    |
| 6l                        | OCH <sub>2</sub> CH <sub>3</sub> | 3-OCH <sub>3</sub> -C <sub>6</sub> H <sub>4</sub> | 17.21 $\pm$ 1.05                        | 19.58 $\pm$ .84                                   | 12.66 $\pm$ .82                         | 14.83 $\pm$ .62                                   |
| 6m                        | OCH <sub>2</sub> CH <sub>3</sub> | 4-OCH <sub>3</sub> -C <sub>6</sub> H <sub>4</sub> | 16.16 $\pm$ .62                         | 18.75 $\pm$ .79                                   | 13.5 $\pm$ .82                          | 15.25 $\pm$ .43                                   |
| 6n                        | OCH <sub>2</sub> CH <sub>3</sub> | 4-OEt- C <sub>6</sub> H <sub>4</sub>              | 15.83 $\pm$ .54                         | 19.41 $\pm$ .61                                   | 14.91 $\pm$ .60                         | 18.08 $\pm$ .76                                   |
| 8a                        | OCH <sub>3</sub>                 | C <sub>6</sub> H <sub>4</sub>                     | 18.08 $\pm$ .25                         | 20.83 $\pm$ .83                                   | 13.41 $\pm$ .12                         | 14.83 $\pm$ .44                                   |
| 8b                        | OCH <sub>3</sub>                 | 4-OH <sub>2</sub> -C <sub>6</sub> H <sub>4</sub>  | 13.91 $\pm$ .66                         | 17.33 $\pm$ .58                                   | 11.16 $\pm$ .54                         | 12.58 $\pm$ .46                                   |
| 8c                        | OCH <sub>3</sub>                 | 4-OEt-C <sub>6</sub> H <sub>4</sub>               | 18.50 $\pm$ .70                         | 21.5 $\pm$ .30                                    | 14.83 $\pm$ .78                         | 17.7 $\pm$ .34                                    |
| 8d                        | OCH <sub>2</sub> CH <sub>3</sub> | 4-NO <sub>2</sub> -C <sub>6</sub> H <sub>4</sub>  | 12.58 $\pm$ .18                         | 15.33 $\pm$ .39                                   | 10.25 $\pm$ .62                         | 11.33 $\pm$ .31                                   |
| 8e                        | OCH <sub>2</sub> CH <sub>3</sub> | 4-OH <sub>2</sub> -C <sub>6</sub> H <sub>4</sub>  | 13.83 $\pm$ .11                         | 16.83 $\pm$ .33                                   | 10.25 $\pm$ .23                         | 11.23 $\pm$ .14                                   |
| ALZ                       |                                  |                                                   | 13.75 $\pm$ .85                         | 16.08 $\pm$ .56                                   | 6.56 $\pm$ .18                          | 8.33 $\pm$ .27                                    |
| Control                   |                                  |                                                   | 36.41 $\pm$ .121                        |                                                   | 43.75 $\pm$ 1.55                        |                                                   |

**Table 2:** *In vivo* anthelmintic effects of benzimidazole derivatives on *S. obvelata* in infected laboratory mice (n=5). Data are expressed as mean  $\pm$  SEM. All data are statistically significant at  $p \leq 0.005$  followed by Tukey's test

| Groups     | Benzimidazole Derivatives  | Worm Count at Necropsy |                   | Percentage reduction in worm count (%) |
|------------|----------------------------|------------------------|-------------------|----------------------------------------|
|            |                            | Min-Max                | Mean $\pm$ SEM    |                                        |
| <b>I</b>   | <b>Control</b>             | 298-620                | 452 $\pm$ 67.14   | 0                                      |
| <b>II</b>  | <b>6k (-OH)</b>            |                        |                   |                                        |
|            | <b>20 mg/kg</b>            | 104-187                | 145.2 $\pm$ 33.92 | 67.87                                  |
|            | <b>80 mg/kg</b>            | 38-92                  | 71.6 $\pm$ 20.62  | 84.15                                  |
| <b>III</b> | <b>6b (-Br)</b>            |                        |                   |                                        |
|            | <b>20 mg/kg</b>            | 87-232                 | 160.2 $\pm$ 53.65 | 64.55                                  |
|            | <b>80 mg/kg</b>            | 57-116                 | 90.2 $\pm$ 22.96  | 80.04                                  |
| <b>IV</b>  | <b>8d (NO<sub>2</sub>)</b> |                        |                   |                                        |
|            | <b>20 mg/kg</b>            | 54-147                 | 103.8 $\pm$ 33.64 | 77.03                                  |
|            | <b>80 mg/kg</b>            | 17-64                  | 39.8 $\pm$ 17.65  | 91.19                                  |
| <b>V</b>   | <b>Albendazole</b>         | 23-57                  | 39.4 $\pm$ 13.27  | 91.28                                  |
|            | <b>50 mg/kg</b>            |                        |                   |                                        |

**Table 3:** Repeated 28 days oral administration with benzimidazole derivatives at 80 mg/kg;ALZ at 50 mg/kg . Body weight and relative organ weight (ROW) of mice. Data are expressed as mean  $\pm$  SEM. All data are statistically significant at  $p \leq 0.005$  followed by Tukey's test

| Sl. No. | Compounds                   | BodyWeight (gm) (Week 0) | Body Weight ( gm) (Week 4) | Liver gm)       | Right Kidney (gm) | Left Kidney (gm) | Spleen (gm)     |
|---------|-----------------------------|--------------------------|----------------------------|-----------------|-------------------|------------------|-----------------|
| 1.      | <b>6k(-OH)</b>              | 24.7 $\pm$ 0.10          | 22.8 $\pm$ 0.18            | 1.42 $\pm$ 0.22 | 0.20 $\pm$ 0.16   | 0.22 $\pm$ 0.27  | 0.08 $\pm$ 0.02 |
| 2.      | <b>6b(-Br)</b>              | 27.8 $\pm$ 0.73          | 26.40 $\pm$ 0.42           | 1.45 $\pm$ 0.35 | 0.18 $\pm$ 0.41   | 0.21 $\pm$ 0.13  | 0.07 $\pm$ 0.02 |
| 3.      | <b>8d (-NO<sub>2</sub>)</b> | 27.11 $\pm$ 0.23         | 24.6 $\pm$ 0.63            | 1.32 $\pm$ 0.18 | 0.14 $\pm$ 0.17   | 0.16 $\pm$ 0.20  | 0.10 $\pm$ 0.01 |
| 4.      | <b>Control</b>              | 26.25 $\pm$ 0.31         | 28.26 $\pm$ 0.52           | 1.85 $\pm$ 0.12 | 0.21 $\pm$ 0.21   | 0.23 $\pm$ 0.41  | 0.07 $\pm$ 0.03 |
| 5.      | <b>ALZ</b>                  | 25.41                    | 24.04 $\pm$ 0.33           | 1.62 $\pm$ 0.11 | 0.17 $\pm$ 0.70   | 0.17 $\pm$ 0.15  | 0.06 $\pm$ 0.01 |

**Table 4:** *In silico* Toxicity Prediction of Benzimidazole Derivatives using online tool Protox II

| Compounds | Predicted LD <sub>50</sub> mg/kg | Hepatotoxicity | Cytotoxicity | Mutagenicity  | Carcinogenicity | Immunotoxicity | Toxicity Class |
|-----------|----------------------------------|----------------|--------------|---------------|-----------------|----------------|----------------|
| <b>6b</b> | 2430                             | inactive       | inactive     | inactive      | inactive        | inactive       | <b>V</b>       |
| <b>6c</b> | 2430                             | inactive       | inactive     | inactive      | inactive        | inactive       | <b>V</b>       |
| <b>6d</b> | 2430                             | inactive       | inactive     | inactive      | inactive        | inactive       | <b>V</b>       |
| <b>6e</b> | 2100                             | inactive       | inactive     | inactive      | inactive        | inactive       | <b>V</b>       |
| <b>6f</b> | 2100                             | inactive       | inactive     | inactive      | inactive        | inactive       | <b>V</b>       |
| <b>6h</b> | 2430                             | inactive       | inactive     | inactive      | inactive        | inactive       | <b>V</b>       |
| <b>6i</b> | 1770                             | inactive       | inactive     | inactive      | inactive        | <u>active</u>  | <b>IV</b>      |
| <b>6j</b> | 630                              | inactive       | inactive     | inactive      | inactive        | inactive       | <b>IV</b>      |
| <b>6k</b> | 2430                             | inactive       | inactive     | inactive      | inactive        | inactive       | <b>V</b>       |
| <b>6l</b> | 800                              | inactive       | inactive     | inactive      | inactive        | inactive       | <b>IV</b>      |
| <b>6m</b> | 2100                             | inactive       | inactive     | inactive      | inactive        | inactive       | <b>V</b>       |
| <b>6n</b> | 2100                             | inactive       | inactive     | inactive      | inactive        | inactive       | <b>V</b>       |
| <b>8a</b> | 2100                             | inactive       | inactive     | inactive      | inactive        | inactive       | <b>V</b>       |
| <b>8b</b> | 2100                             | <u>active</u>  | inactive     | <u>active</u> | <u>active</u>   | inactive       | <b>V</b>       |
| <b>8c</b> | 2100                             | inactive       | inactive     | <u>active</u> | inactive        | inactive       | <b>V</b>       |
| <b>8d</b> | 2025                             | inactive       | inactive     | <u>active</u> | <u>active</u>   | inactive       | <b>V</b>       |
| <b>8e</b> | 2025                             | inactive       | inactive     | inactive      | inactive        | inactive       | <b>V</b>       |
